# Supplementary material for: Sensitive determination of two major mercapturic acid metabolites of 1,3-butadiene in human urine based on the isotope dilution ultrahigh performance liquid chromatography-tandem mass spectrometry
Source: Royal Society of Chemistry journal article supplement (doi:10.1039/c4ay03058c), 2015-01-01

# Method Development Report

|                        |                                                                                  |
|------------------------|----------------------------------------------------------------------------------|
| MS1 Resolution         | 0.75                                                                             |
| MS2 Resolution         | 0.75                                                                             |
| Calibration Method     | C:\MassLynx\IntelliStart\Results\Unit Mass Resolution\Calibration_20141016_2.cal |
| Tune Method            | C:\Massdata2014\MHBMA.PRO\ACQUDB\MHBMA .IPR                                      |
| Cone Voltage Range     | 2 - 100                                                                          |
| Collision Energy Range | 2 - 80                                                                           |
| Lowest Fragment Mass   | 80.00                                                                            |
| Excluded Losses        | 18.00, 44.00                                                                     |

Date: Generated on Wed 04 Mar 2015 at 16:52

## Results

IntelliStart generated the following experiments:

|                |                                                        |
|----------------|--------------------------------------------------------|
| MRM Experiment | C:\Massdata2014\MHBMA.PRO\ACQUDB\D7-DHBMA-15-03-04.exp |
|----------------|--------------------------------------------------------|

IntelliStart found the following compounds:

| Compound | Formula/Mass |   | Parent m/z | Cone Voltage | Daughters | Collision Energy | Ion Mode |
|----------|--------------|---|------------|--------------|-----------|------------------|----------|
| D7-DHBMA | 258          | 1 | 257.03     | 26           | 128.05    | 14               | ES-      |
|          |              | 2 | 257.03     | 26           | 110.03    | 22               | ES-      |

## Compound

D7-DHBMA  
(258)

Transition 1: ES-, m/z 257.03 → 128.05

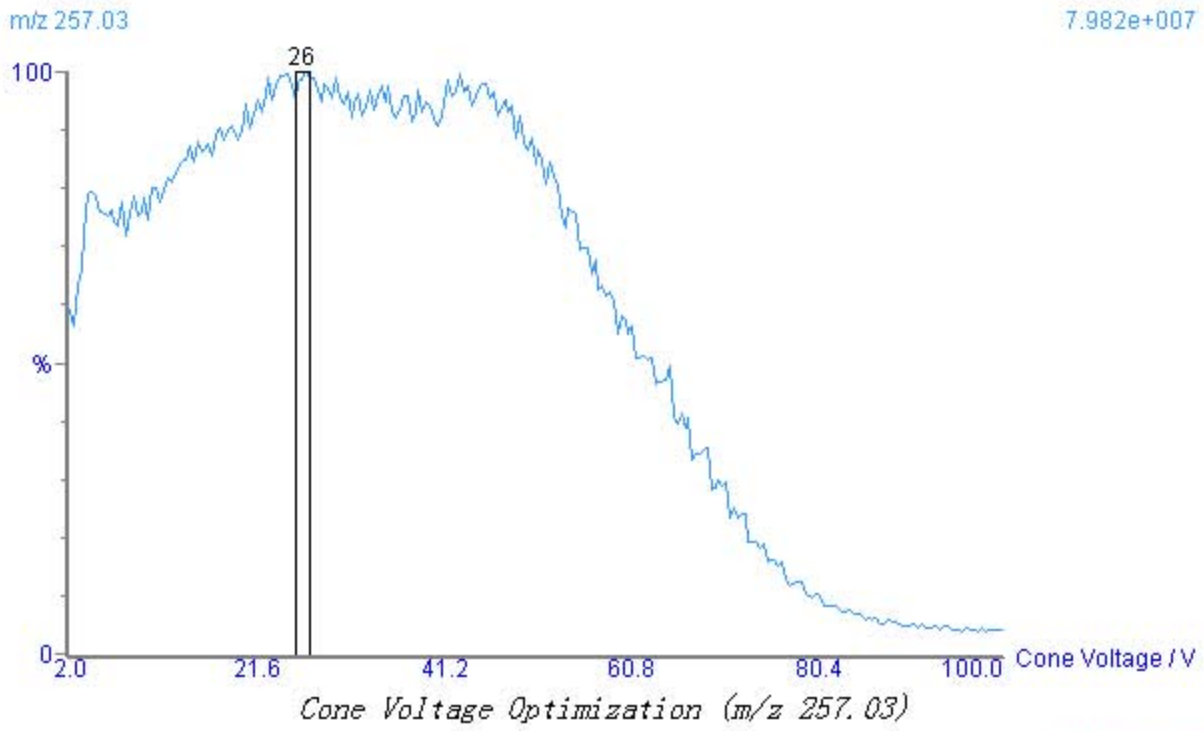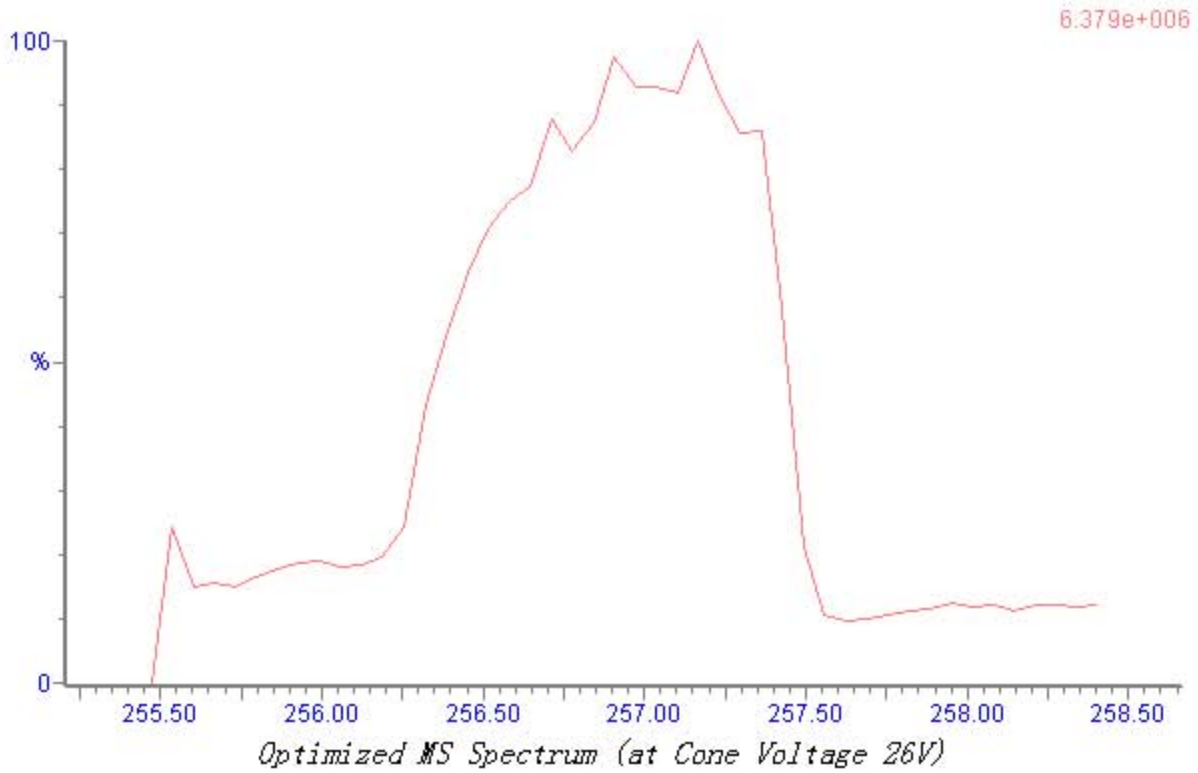

m/z 257.03 -&gt; 128.05

2.274e+007

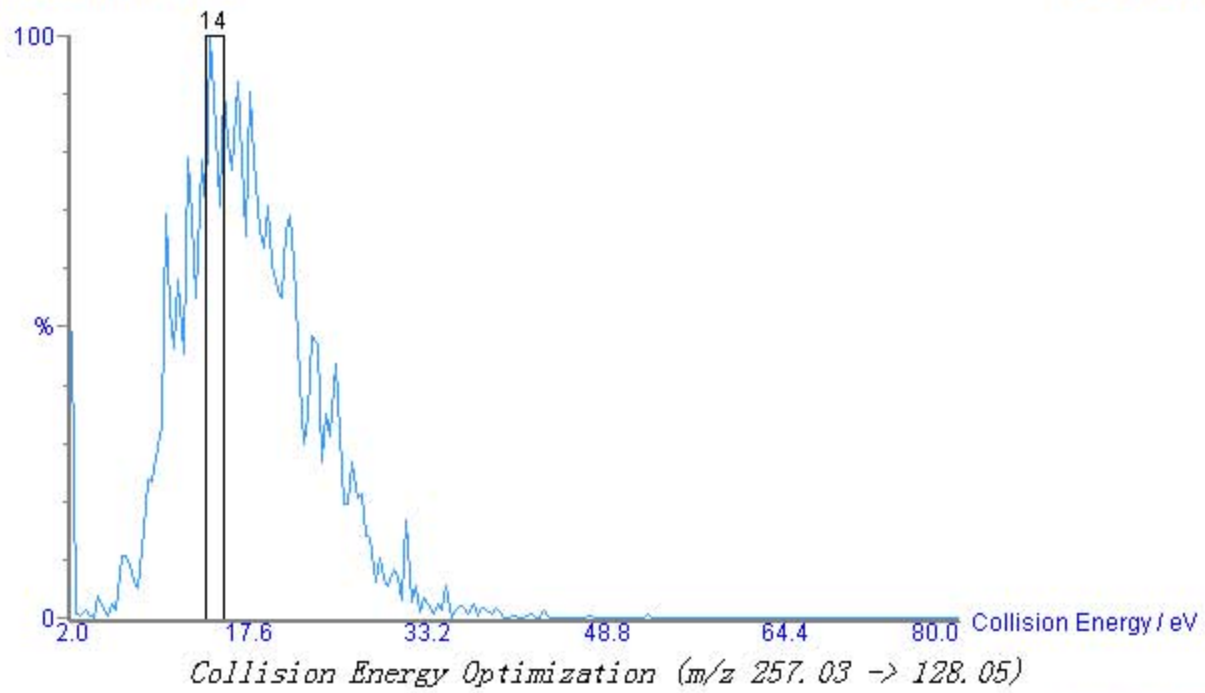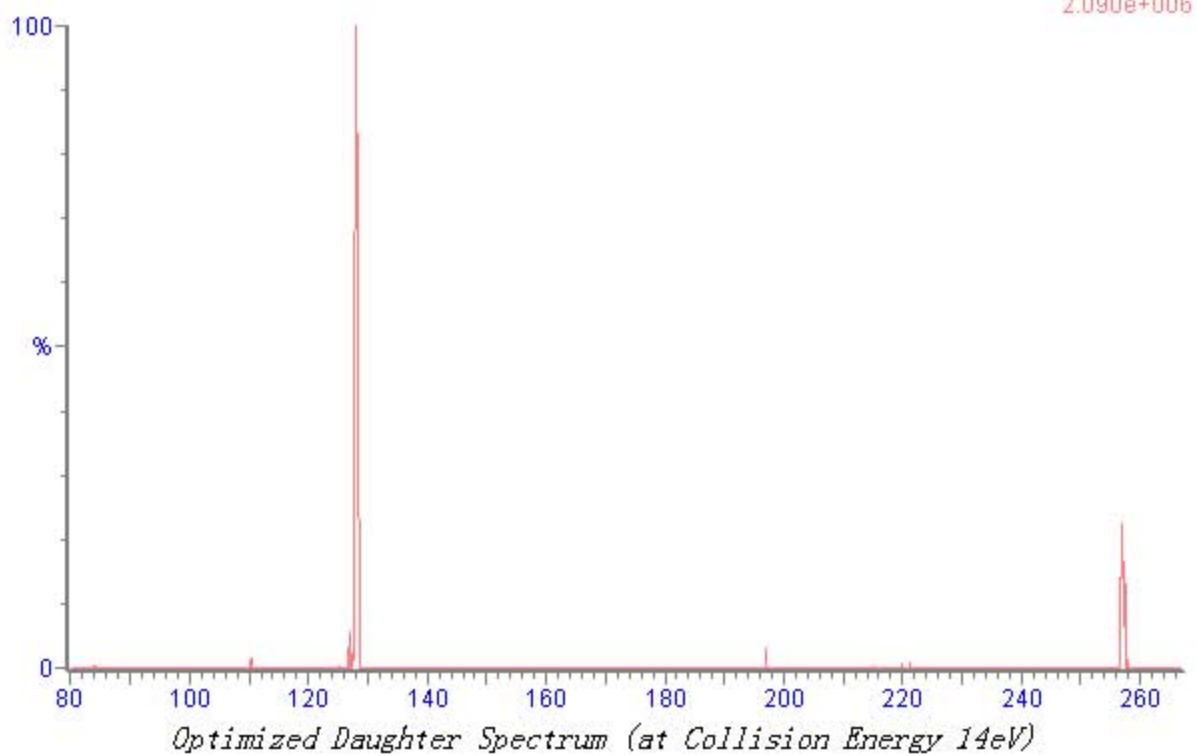**Transition 2: ES-, m/z 257.03 -> 110.03**



m/z 257.03 -&gt; 110.03

9.226e+005

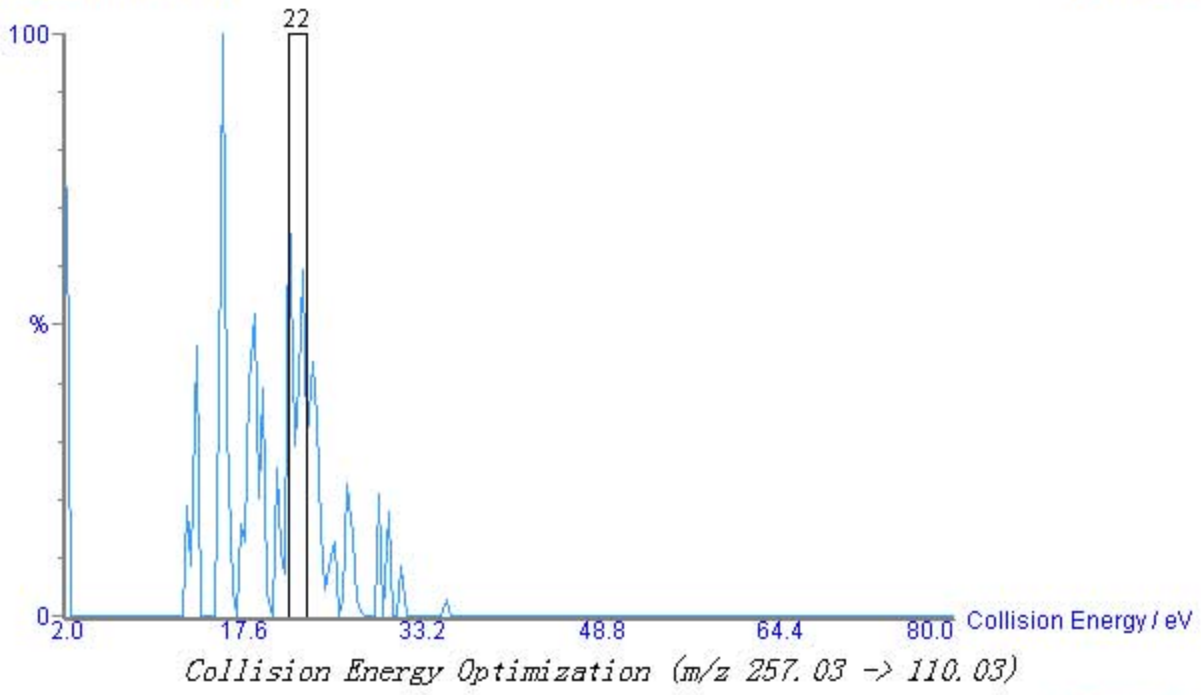

9.553e+005

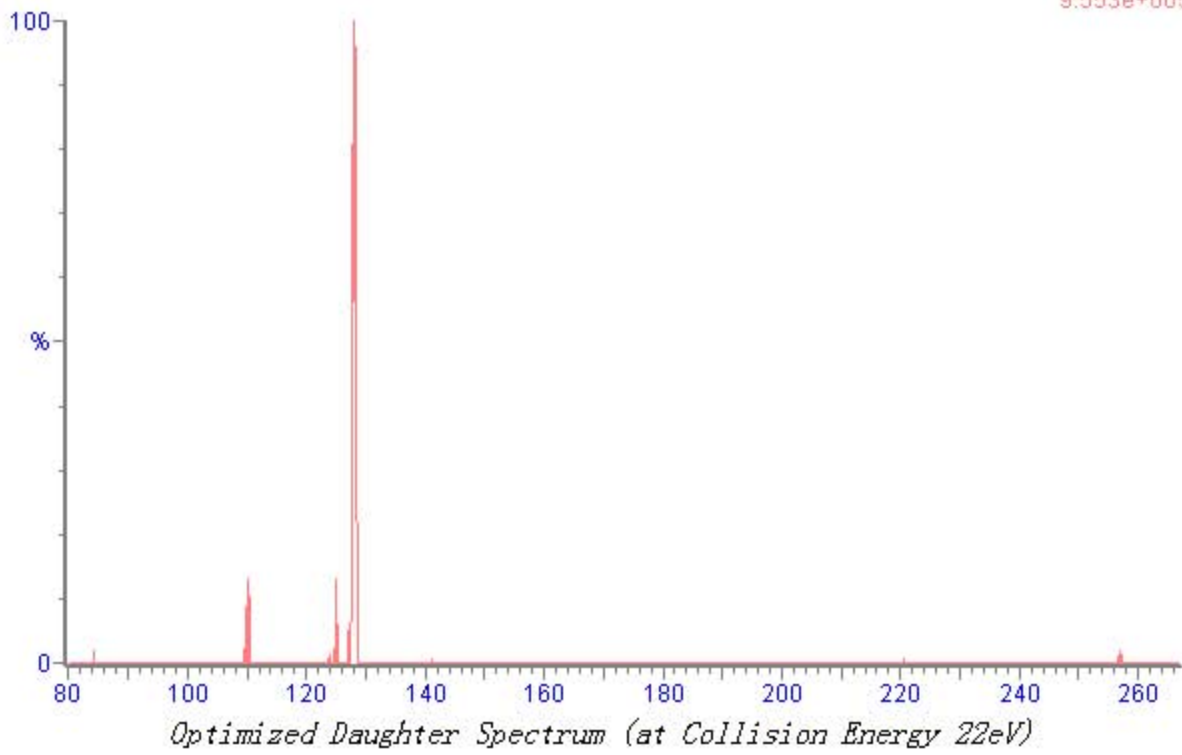

Supplement: c4ay03058c2.pdf [file c4ay03058c2.pdf]
