# Supplementary material for: Sensitive determination of two major mercapturic acid metabolites of 1,3-butadiene in human urine based on the isotope dilution ultrahigh performance liquid chromatography-tandem mass spectrometry
Source: Royal Society of Chemistry journal article supplement (doi:10.1039/c4ay03058c), 2015-01-01

# Method Development Report

|                        |                                                                                  |
|------------------------|----------------------------------------------------------------------------------|
| MS1 Resolution         | 0.75                                                                             |
| MS2 Resolution         | 0.75                                                                             |
| Calibration Method     | C:\MassLynx\IntelliStart\Results\Unit Mass Resolution\Calibration_20141016_2.cal |
| Tune Method            | C:\Massdata2014\MHBMA.PRO\ACQUDB\MHBMA .IPR                                      |
| Cone Voltage Range     | 2 - 100                                                                          |
| Collision Energy Range | 2 - 80                                                                           |
| Lowest Fragment Mass   | 40.00                                                                            |
| Excluded Losses        | 18.00, 44.00                                                                     |

Date: Generated on Wed 04 Mar 2015 at 10:03

## Results

IntelliStart generated the following experiments:

|                |                                                     |
|----------------|-----------------------------------------------------|
| MRM Experiment | C:\Massdata2014\MHBMA.PRO\ACQUDB\MHBMA-15-03-04.exp |
|----------------|-----------------------------------------------------|

IntelliStart found the following compounds:

| Compound | Formula/Mass |   | Parent m/z | Cone Voltage | Daughters | Collision Energy | Ion Mode |
|----------|--------------|---|------------|--------------|-----------|------------------|----------|
| MHBMA    | 233          | 1 | 232.03     | 24           | 103.04    | 14               | ES-      |
|          |              | 2 | 232.03     | 24           | 73.04     | 22               | ES-      |
|          |              | 3 | 232.03     | 24           | 128.04    | 8                | ES-      |

## Compound

**MHBMA**  
**(233)**

**Transition 1: ES-, m/z 232.03 → 103.04**

m/z 232.03

2.268e+007

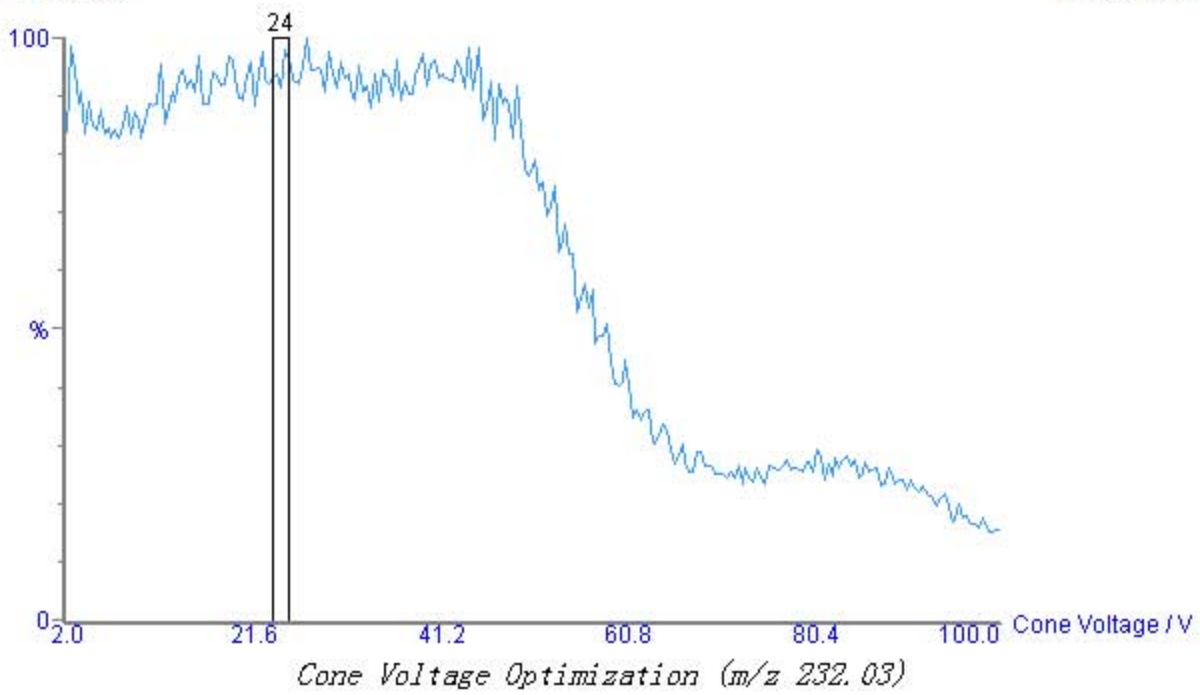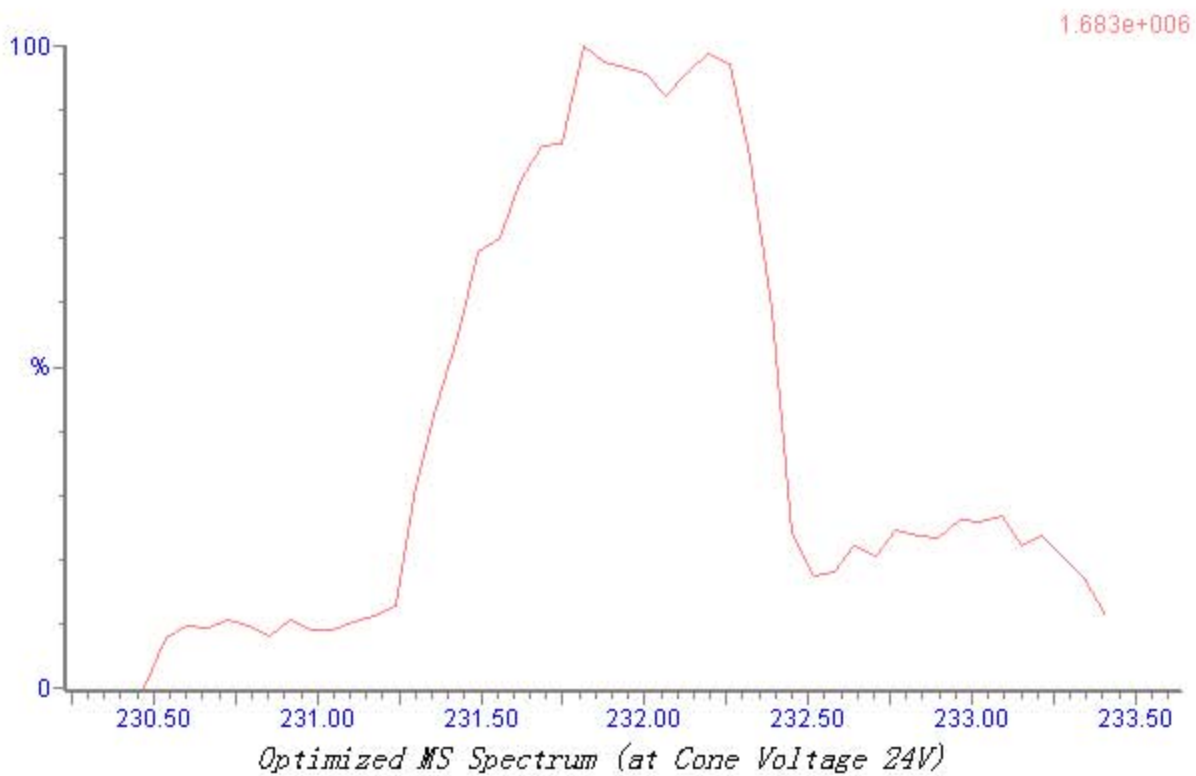

m/z 232.03 -&gt; 103.04

1.440e+007

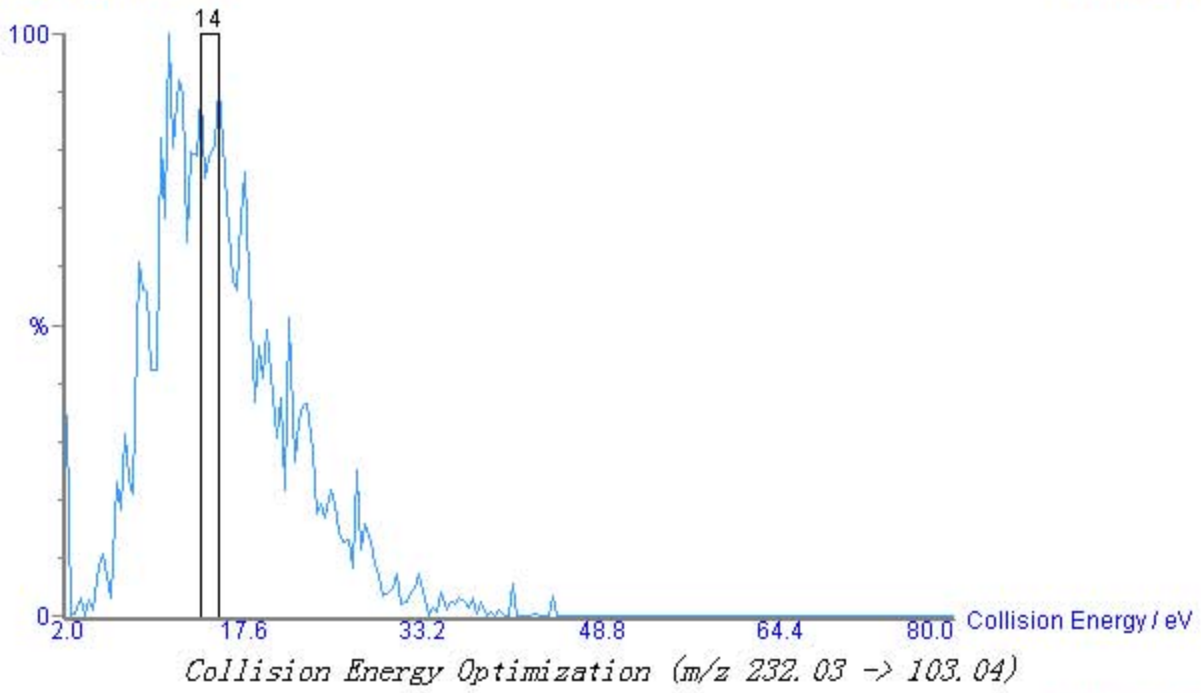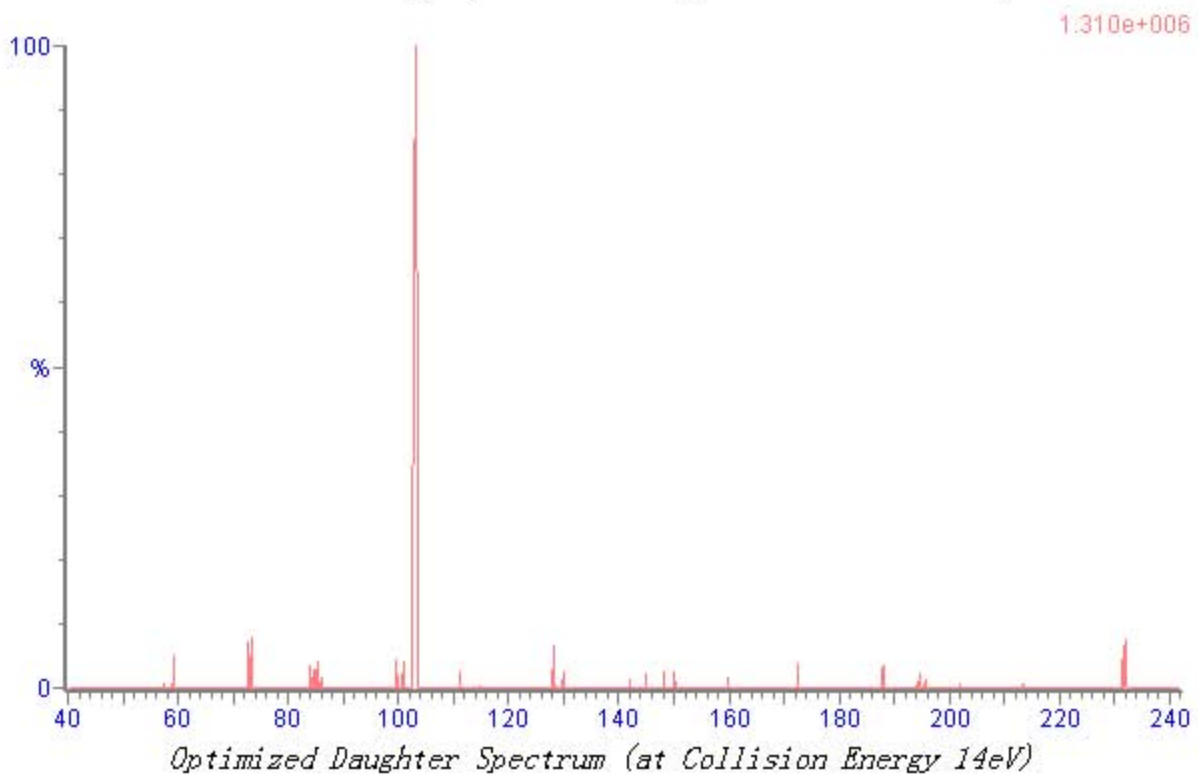**Transition 2: ES-, m/z 232.03 -> 73.04**

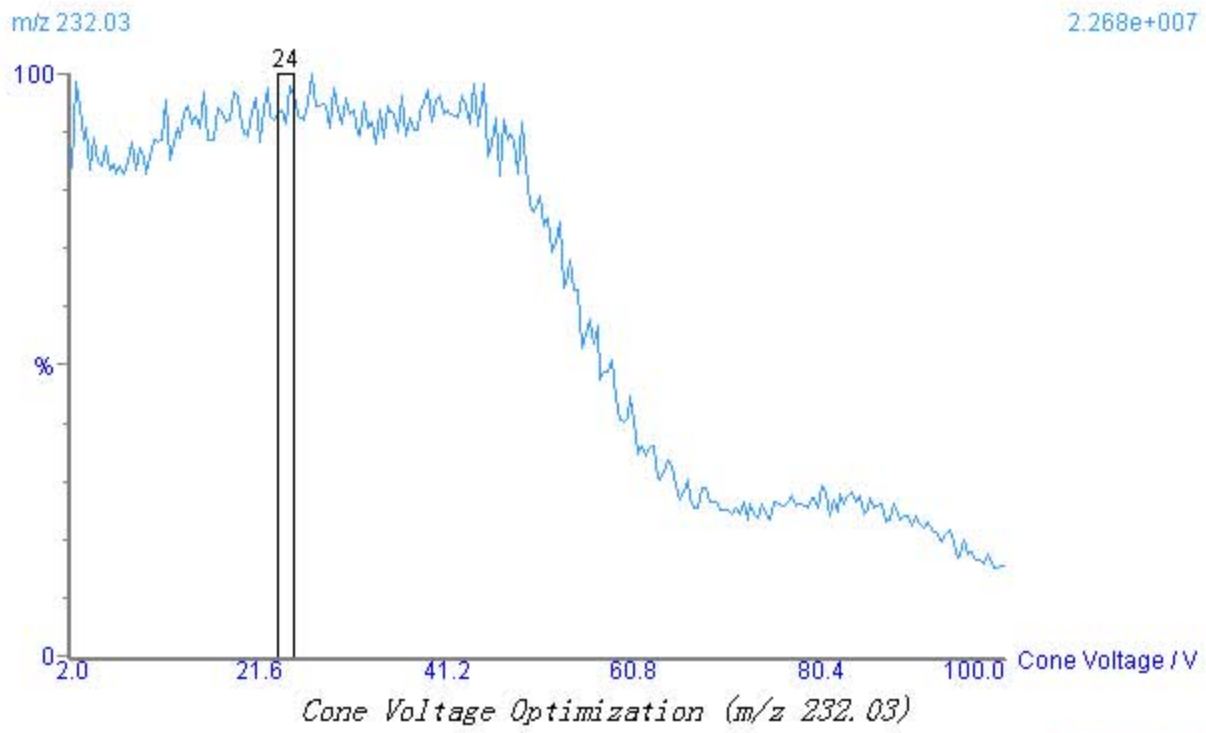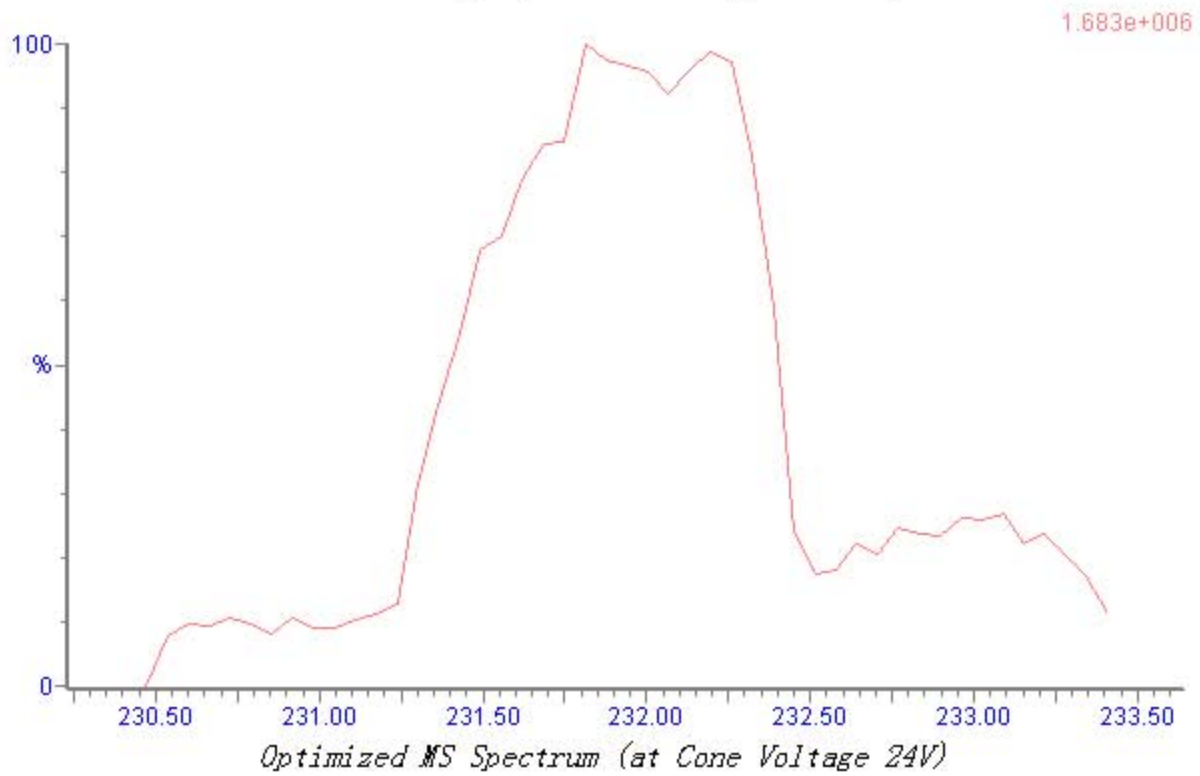

m/z 232.03 -&gt; 73.04

3.618e+006

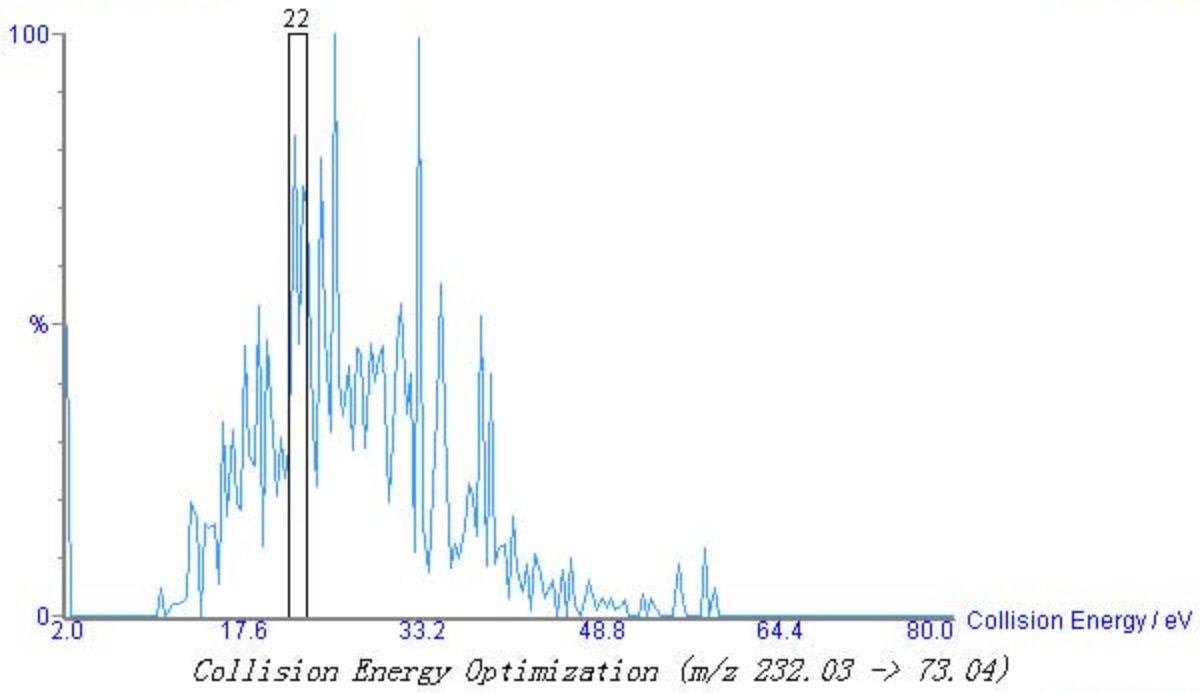

6.429e+005

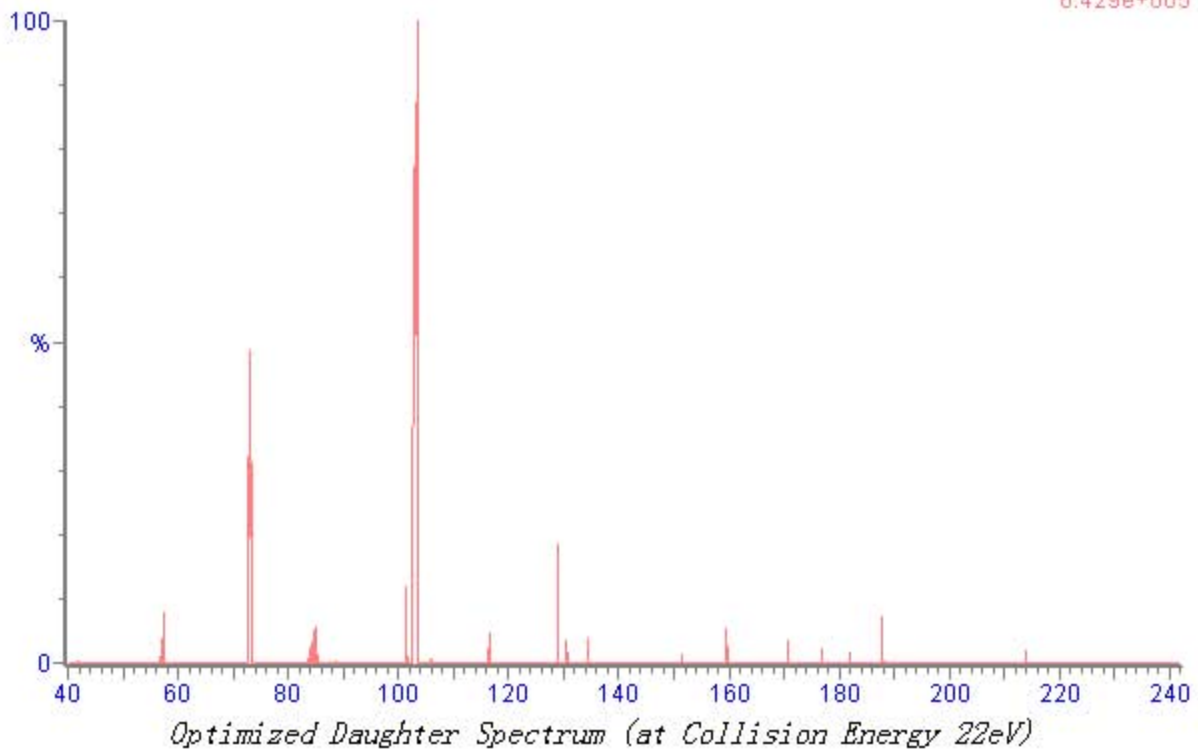**Transition 3: ES-, m/z 232.03 -> 128.04**

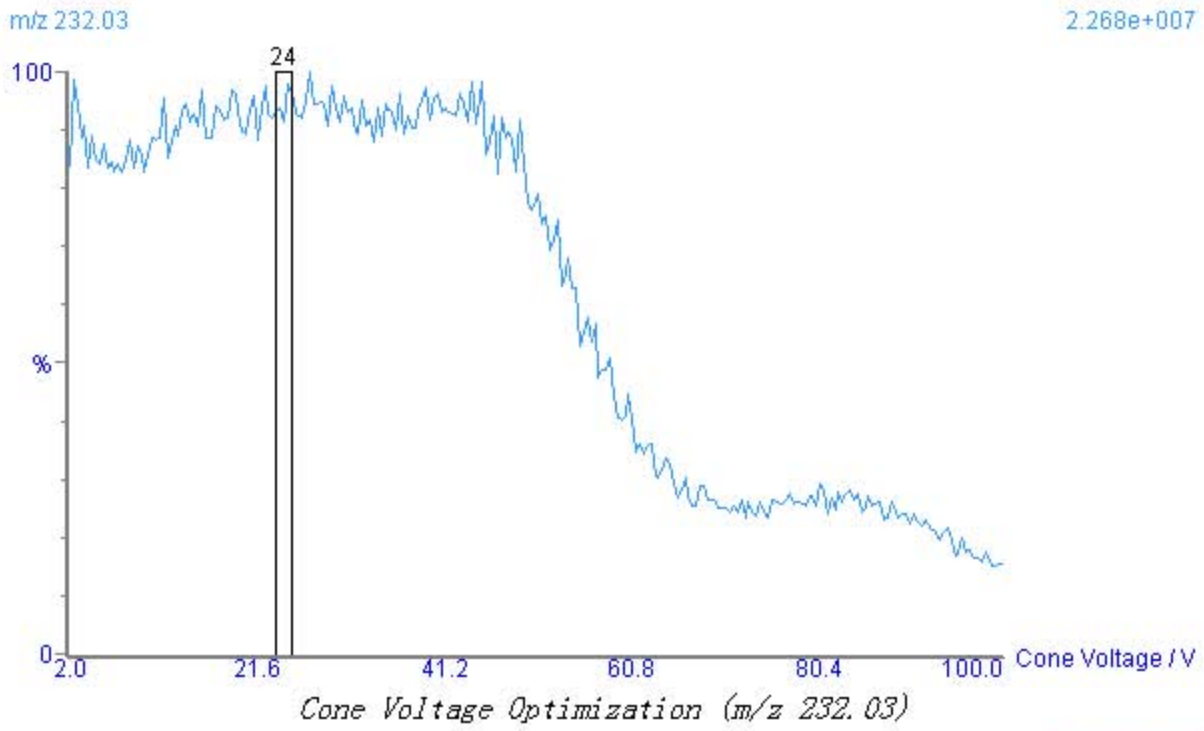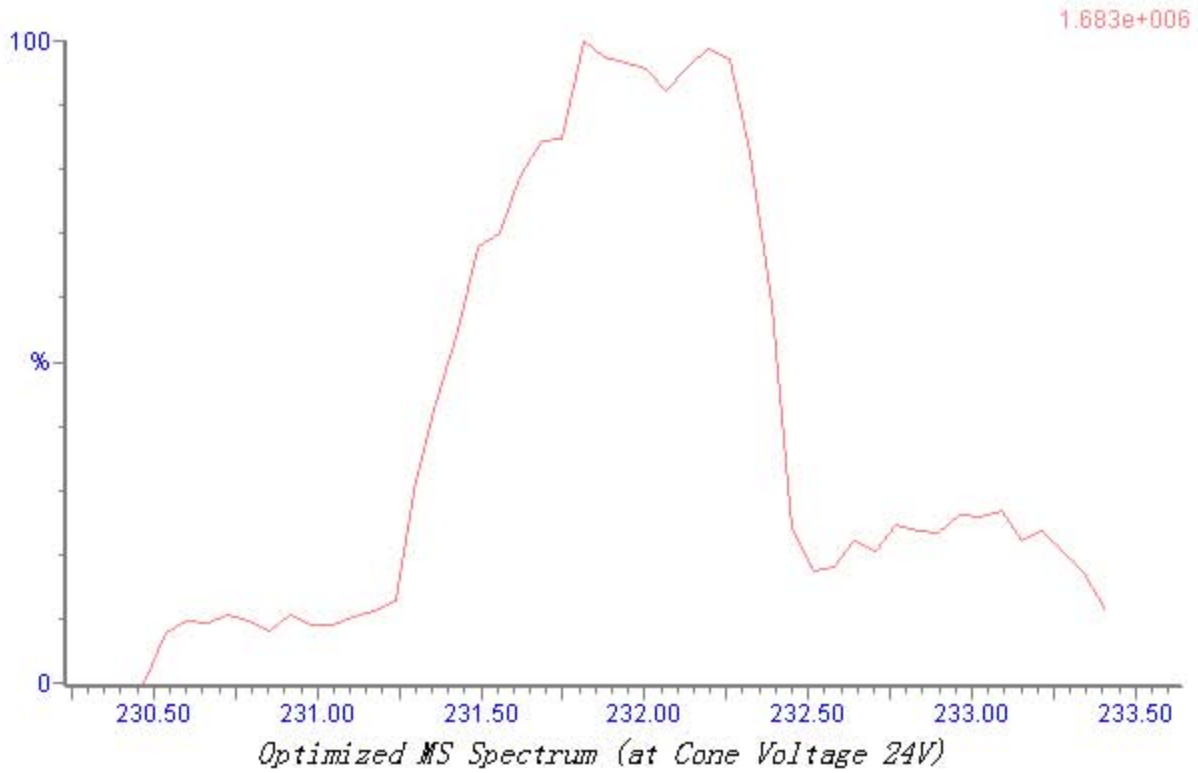

m/z 232.03 -&gt; 128.04

1.112e+006

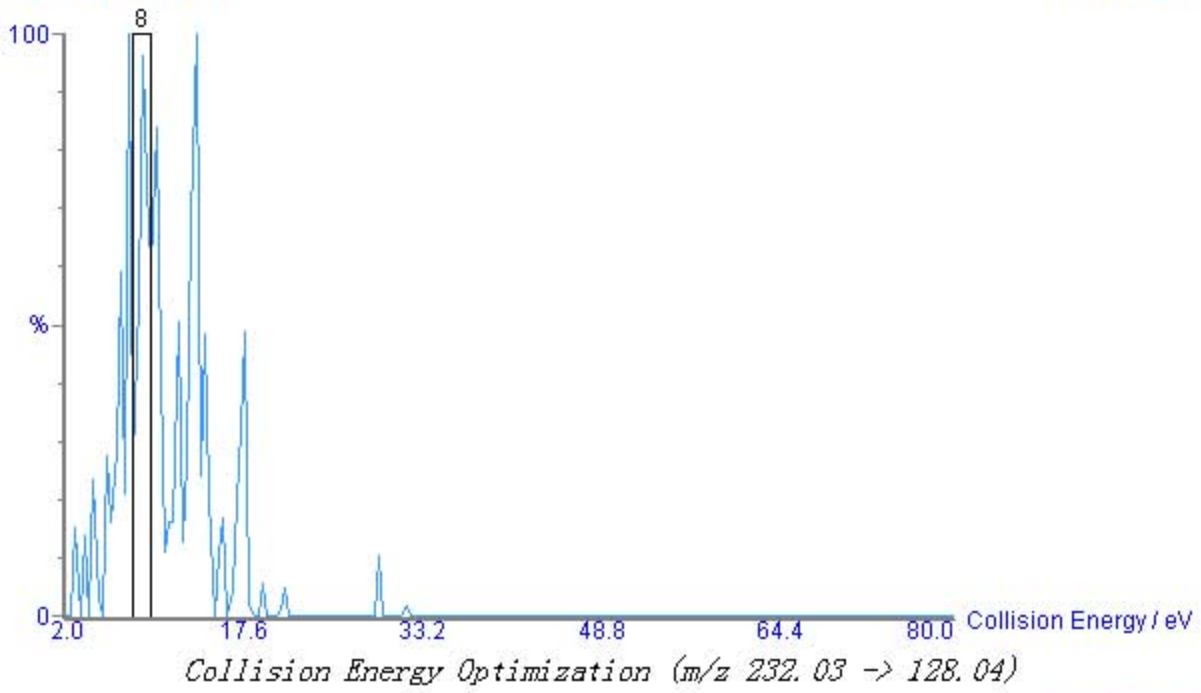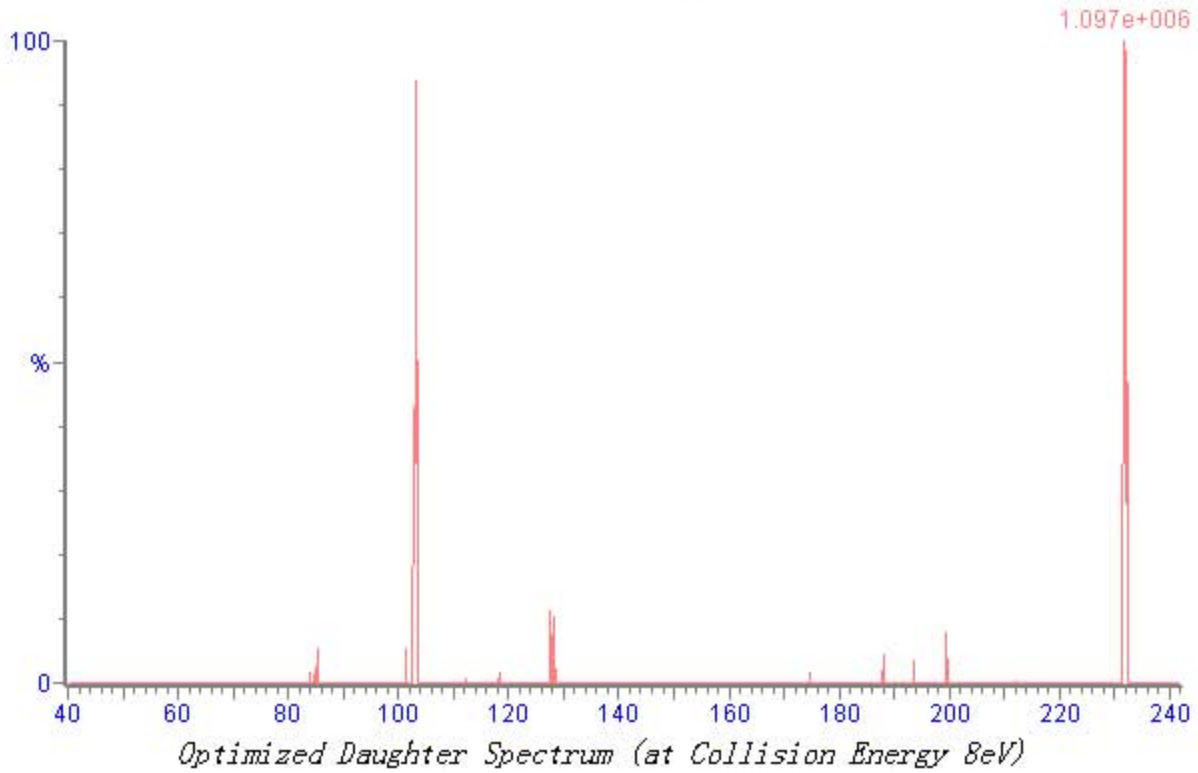

Supplement: c4ay03058c3.pdf [file c4ay03058c3.pdf]
