# Supplementary material for: Sensitive determination of two major mercapturic acid metabolites of 1,3-butadiene in human urine based on the isotope dilution ultrahigh performance liquid chromatography-tandem mass spectrometry
Source: Royal Society of Chemistry journal article supplement (doi:10.1039/c4ay03058c), 2015-01-01
Supplement: c4ay03058c1.pdf [file c4ay03058c1.pdf]

# Method Development Report

|                               |                                                                                  |
|-------------------------------|----------------------------------------------------------------------------------|
| <b>MS1 Resolution</b>         | 0.75                                                                             |
| <b>MS2 Resolution</b>         | 0.75                                                                             |
| <b>Calibration Method</b>     | C:\MassLynx\IntelliStart\Results\Unit Mass Resolution\Calibration_20141016_2.cal |
| <b>Tune Method</b>            | C:\Massdata2014\MHBMA.PRO\ACQUDB\MHBMA .IPR                                      |
| <b>Cone Voltage Range</b>     | 2 - 100                                                                          |
| <b>Collision Energy Range</b> | 2 - 80                                                                           |
| <b>Lowest Fragment Mass</b>   | 80.00                                                                            |
| <b>Excluded Losses</b>        | 18.00, 44.00                                                                     |

Date: Generated on Wed 04 Mar 2015 at 13:03

## Results

IntelliStart generated the following experiments:

|                       |                                                     |
|-----------------------|-----------------------------------------------------|
| <b>MRM Experiment</b> | C:\Massdata2014\MHBMA.PRO\ACQUDB\DHBMA-15-03-04.exp |
|-----------------------|-----------------------------------------------------|

IntelliStart found the following compounds:

| Compound | Formula/Mass |   | Parent m/z | Cone Voltage | Daughters | Collision Energy | Ion Mode |
|----------|--------------|---|------------|--------------|-----------|------------------|----------|
| DHBMA    | 251          | 1 | 249.97     | 44           | 121.08    | 14               | ES-      |
|          |              | 2 | 249.97     | 44           | 128.04    | 12               | ES-      |
|          |              | 3 | 249.97     | 44           | 103.04    | 14               | ES-      |

## Compound

### DHBMA (251)

Transition 1: ES-, m/z 249.97 -> 121.08

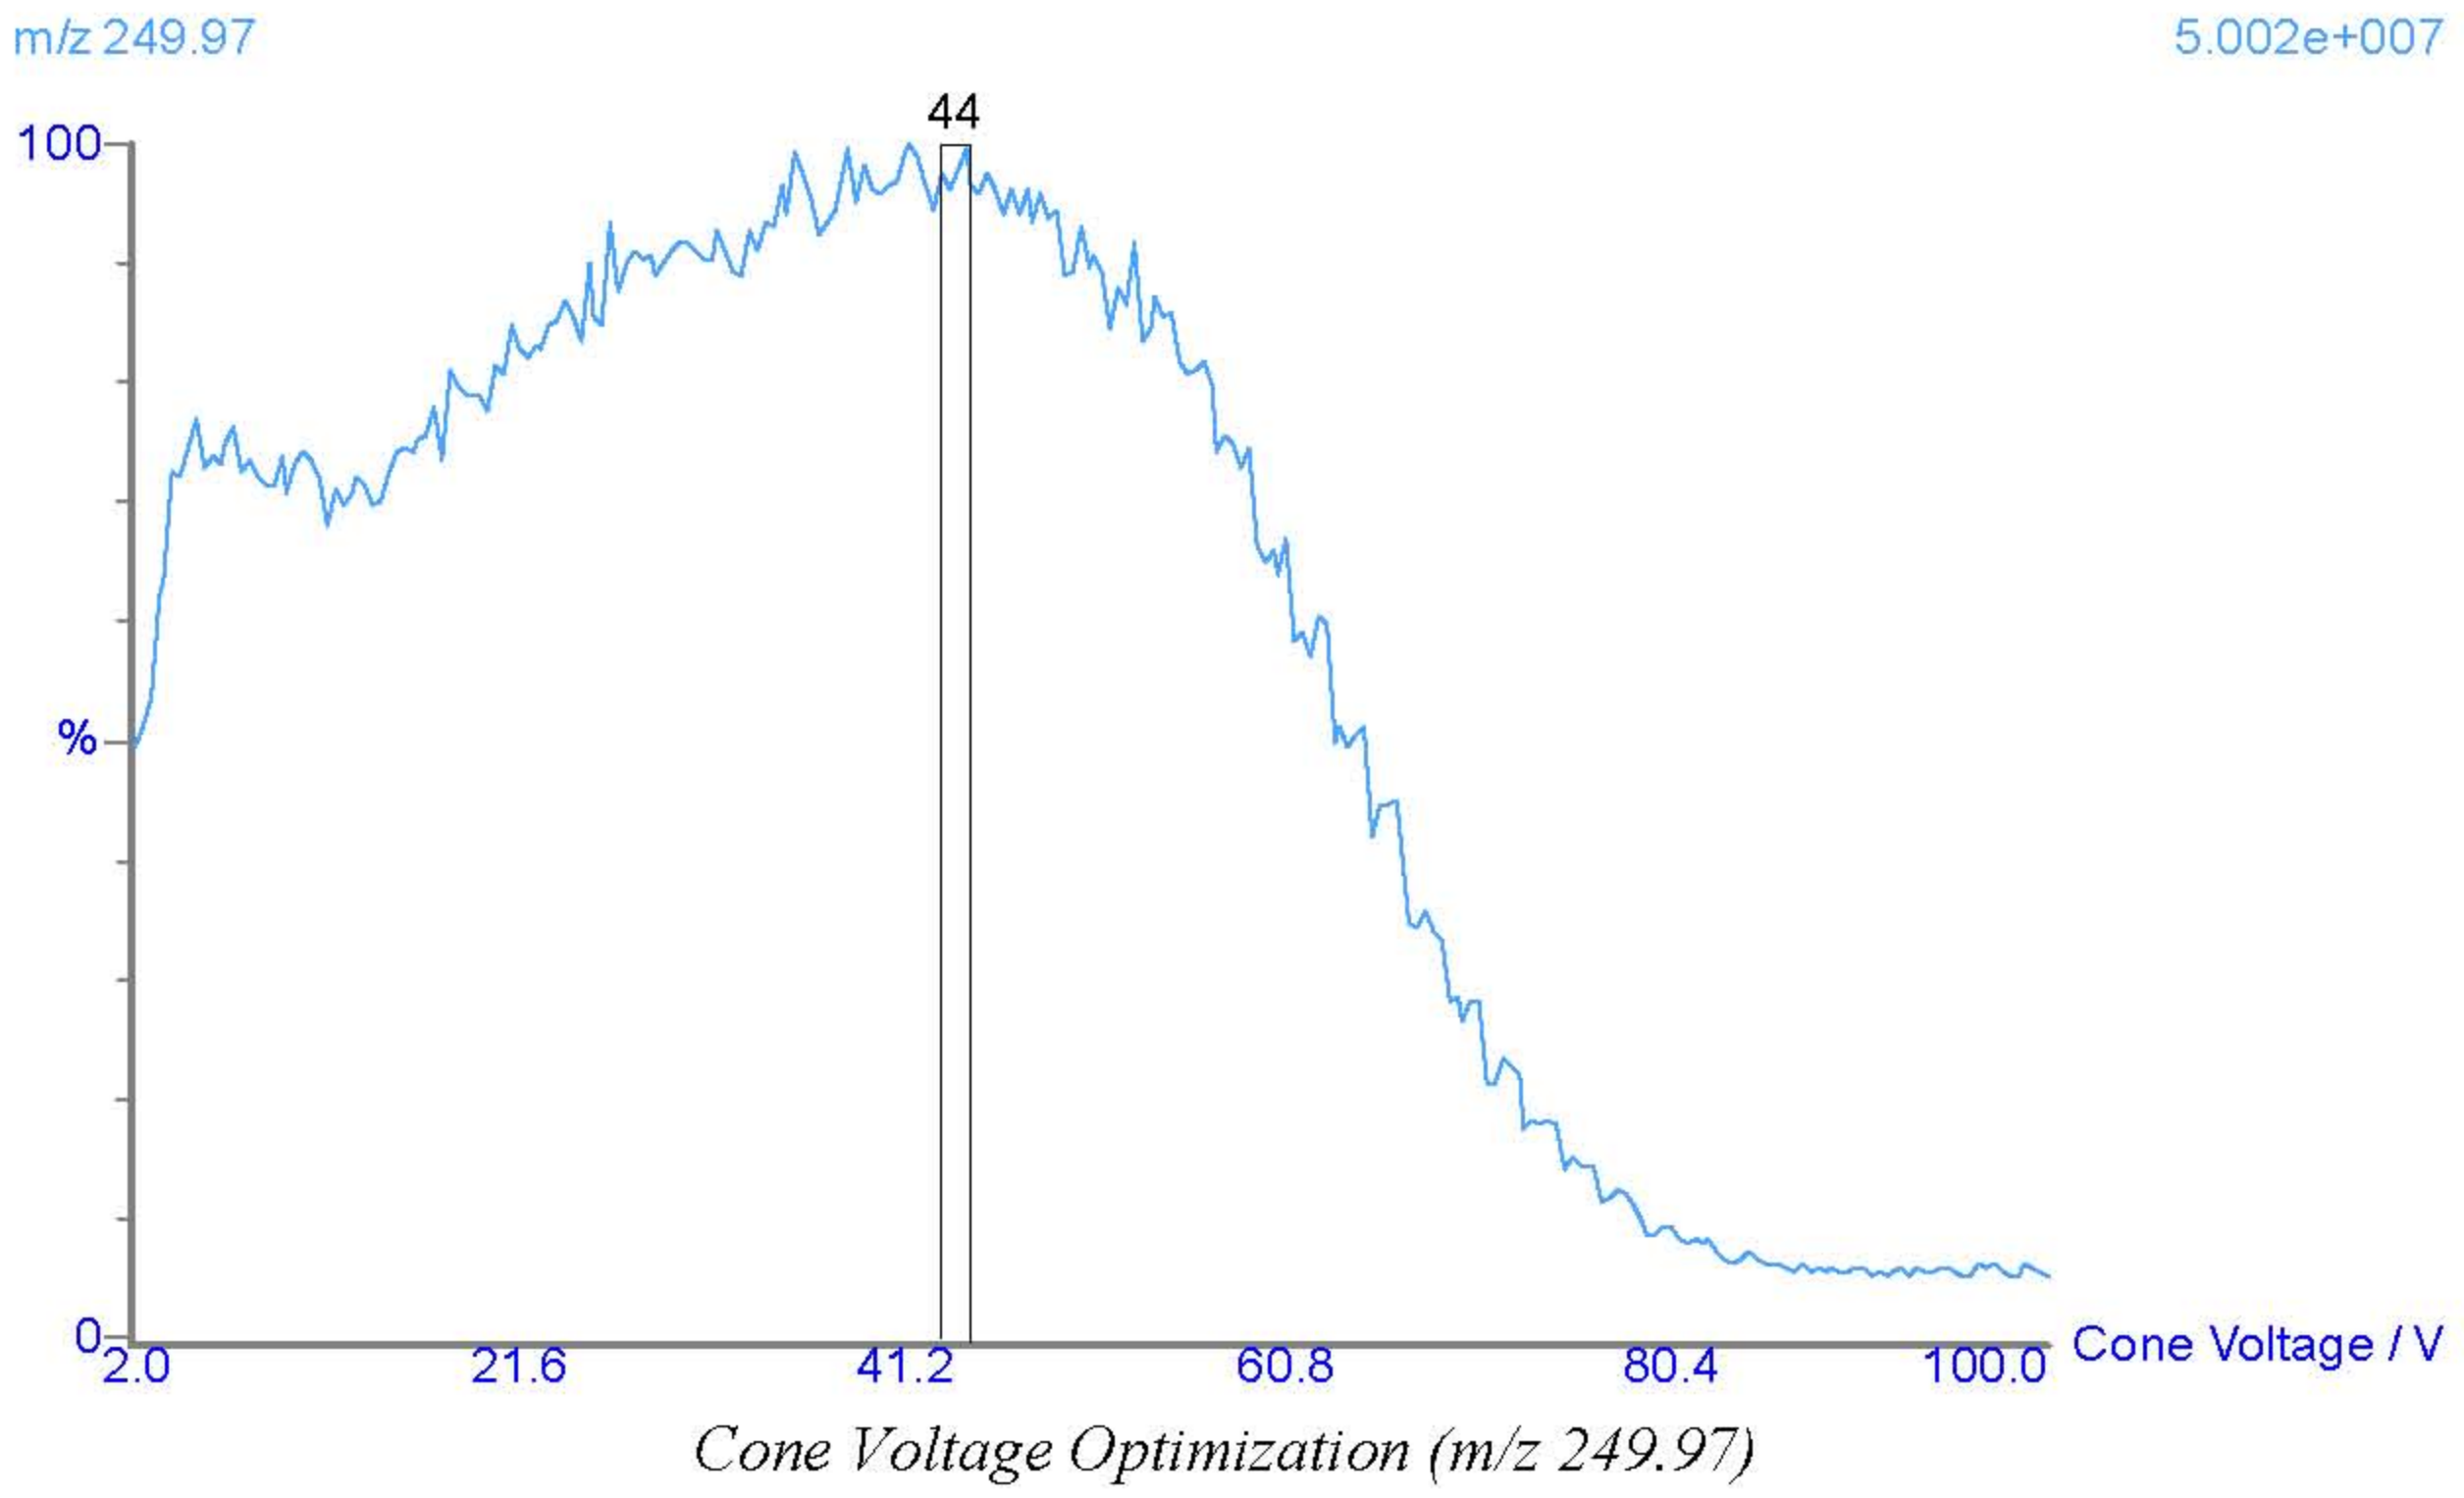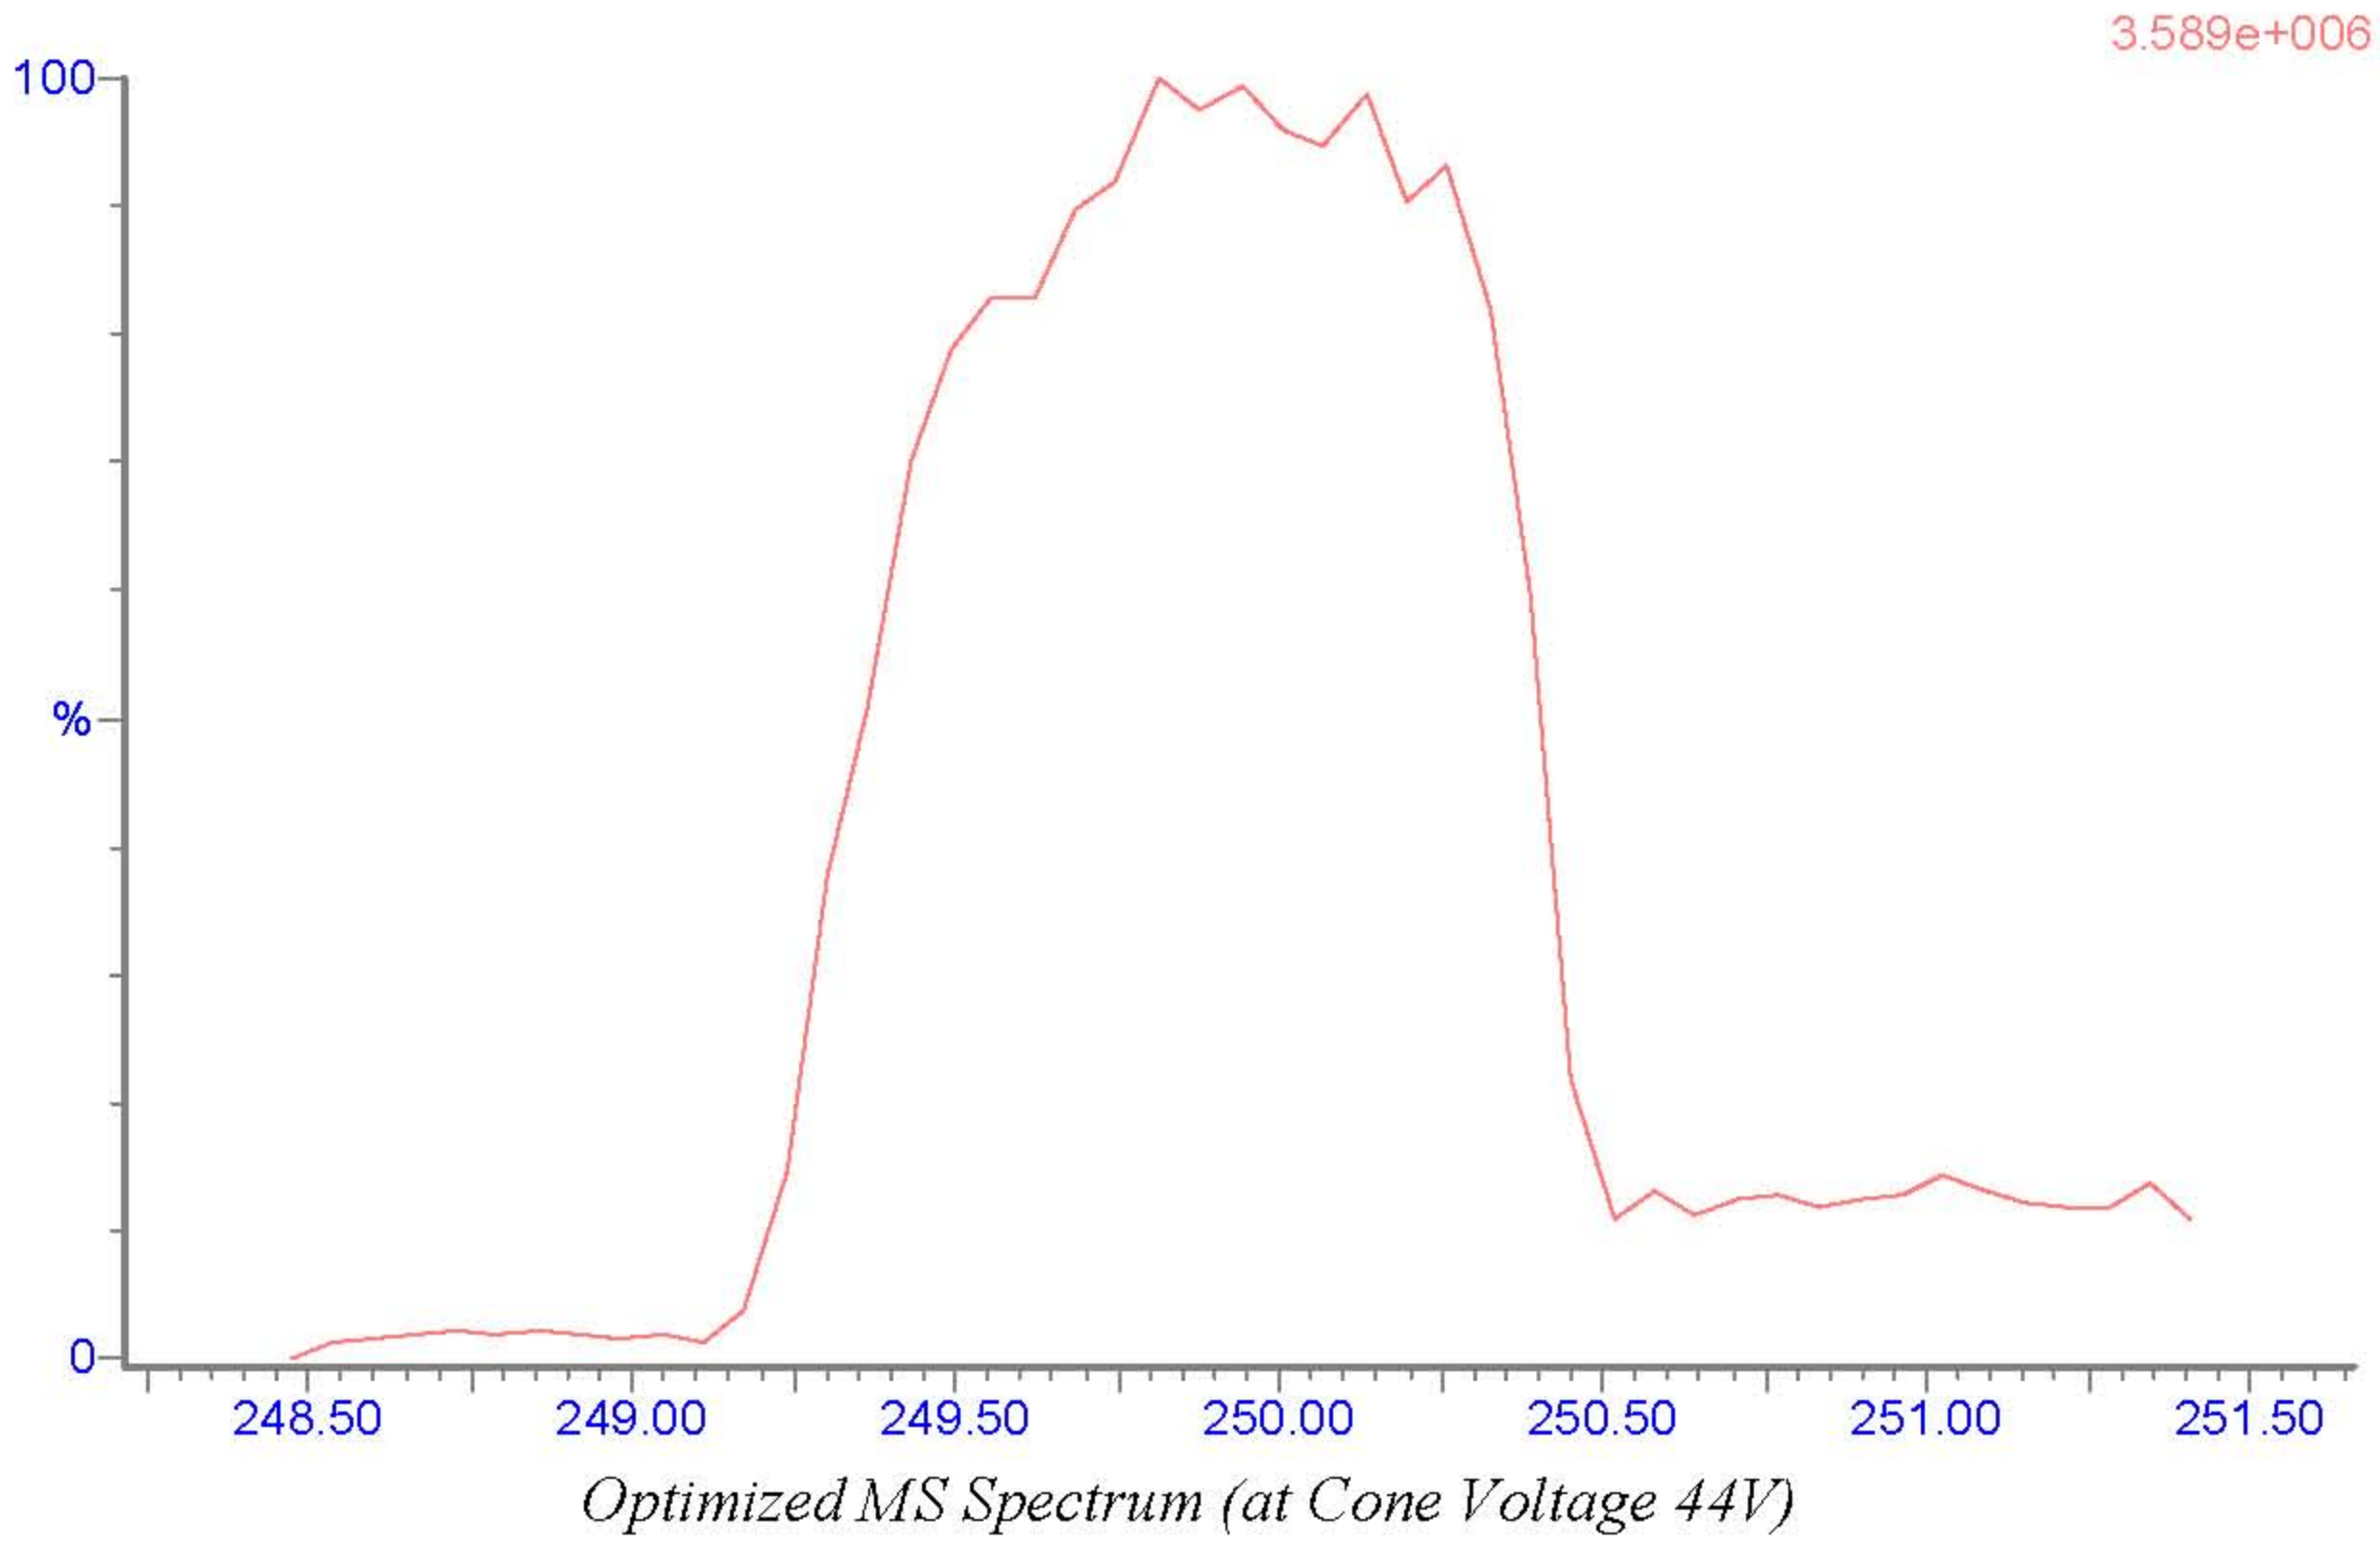

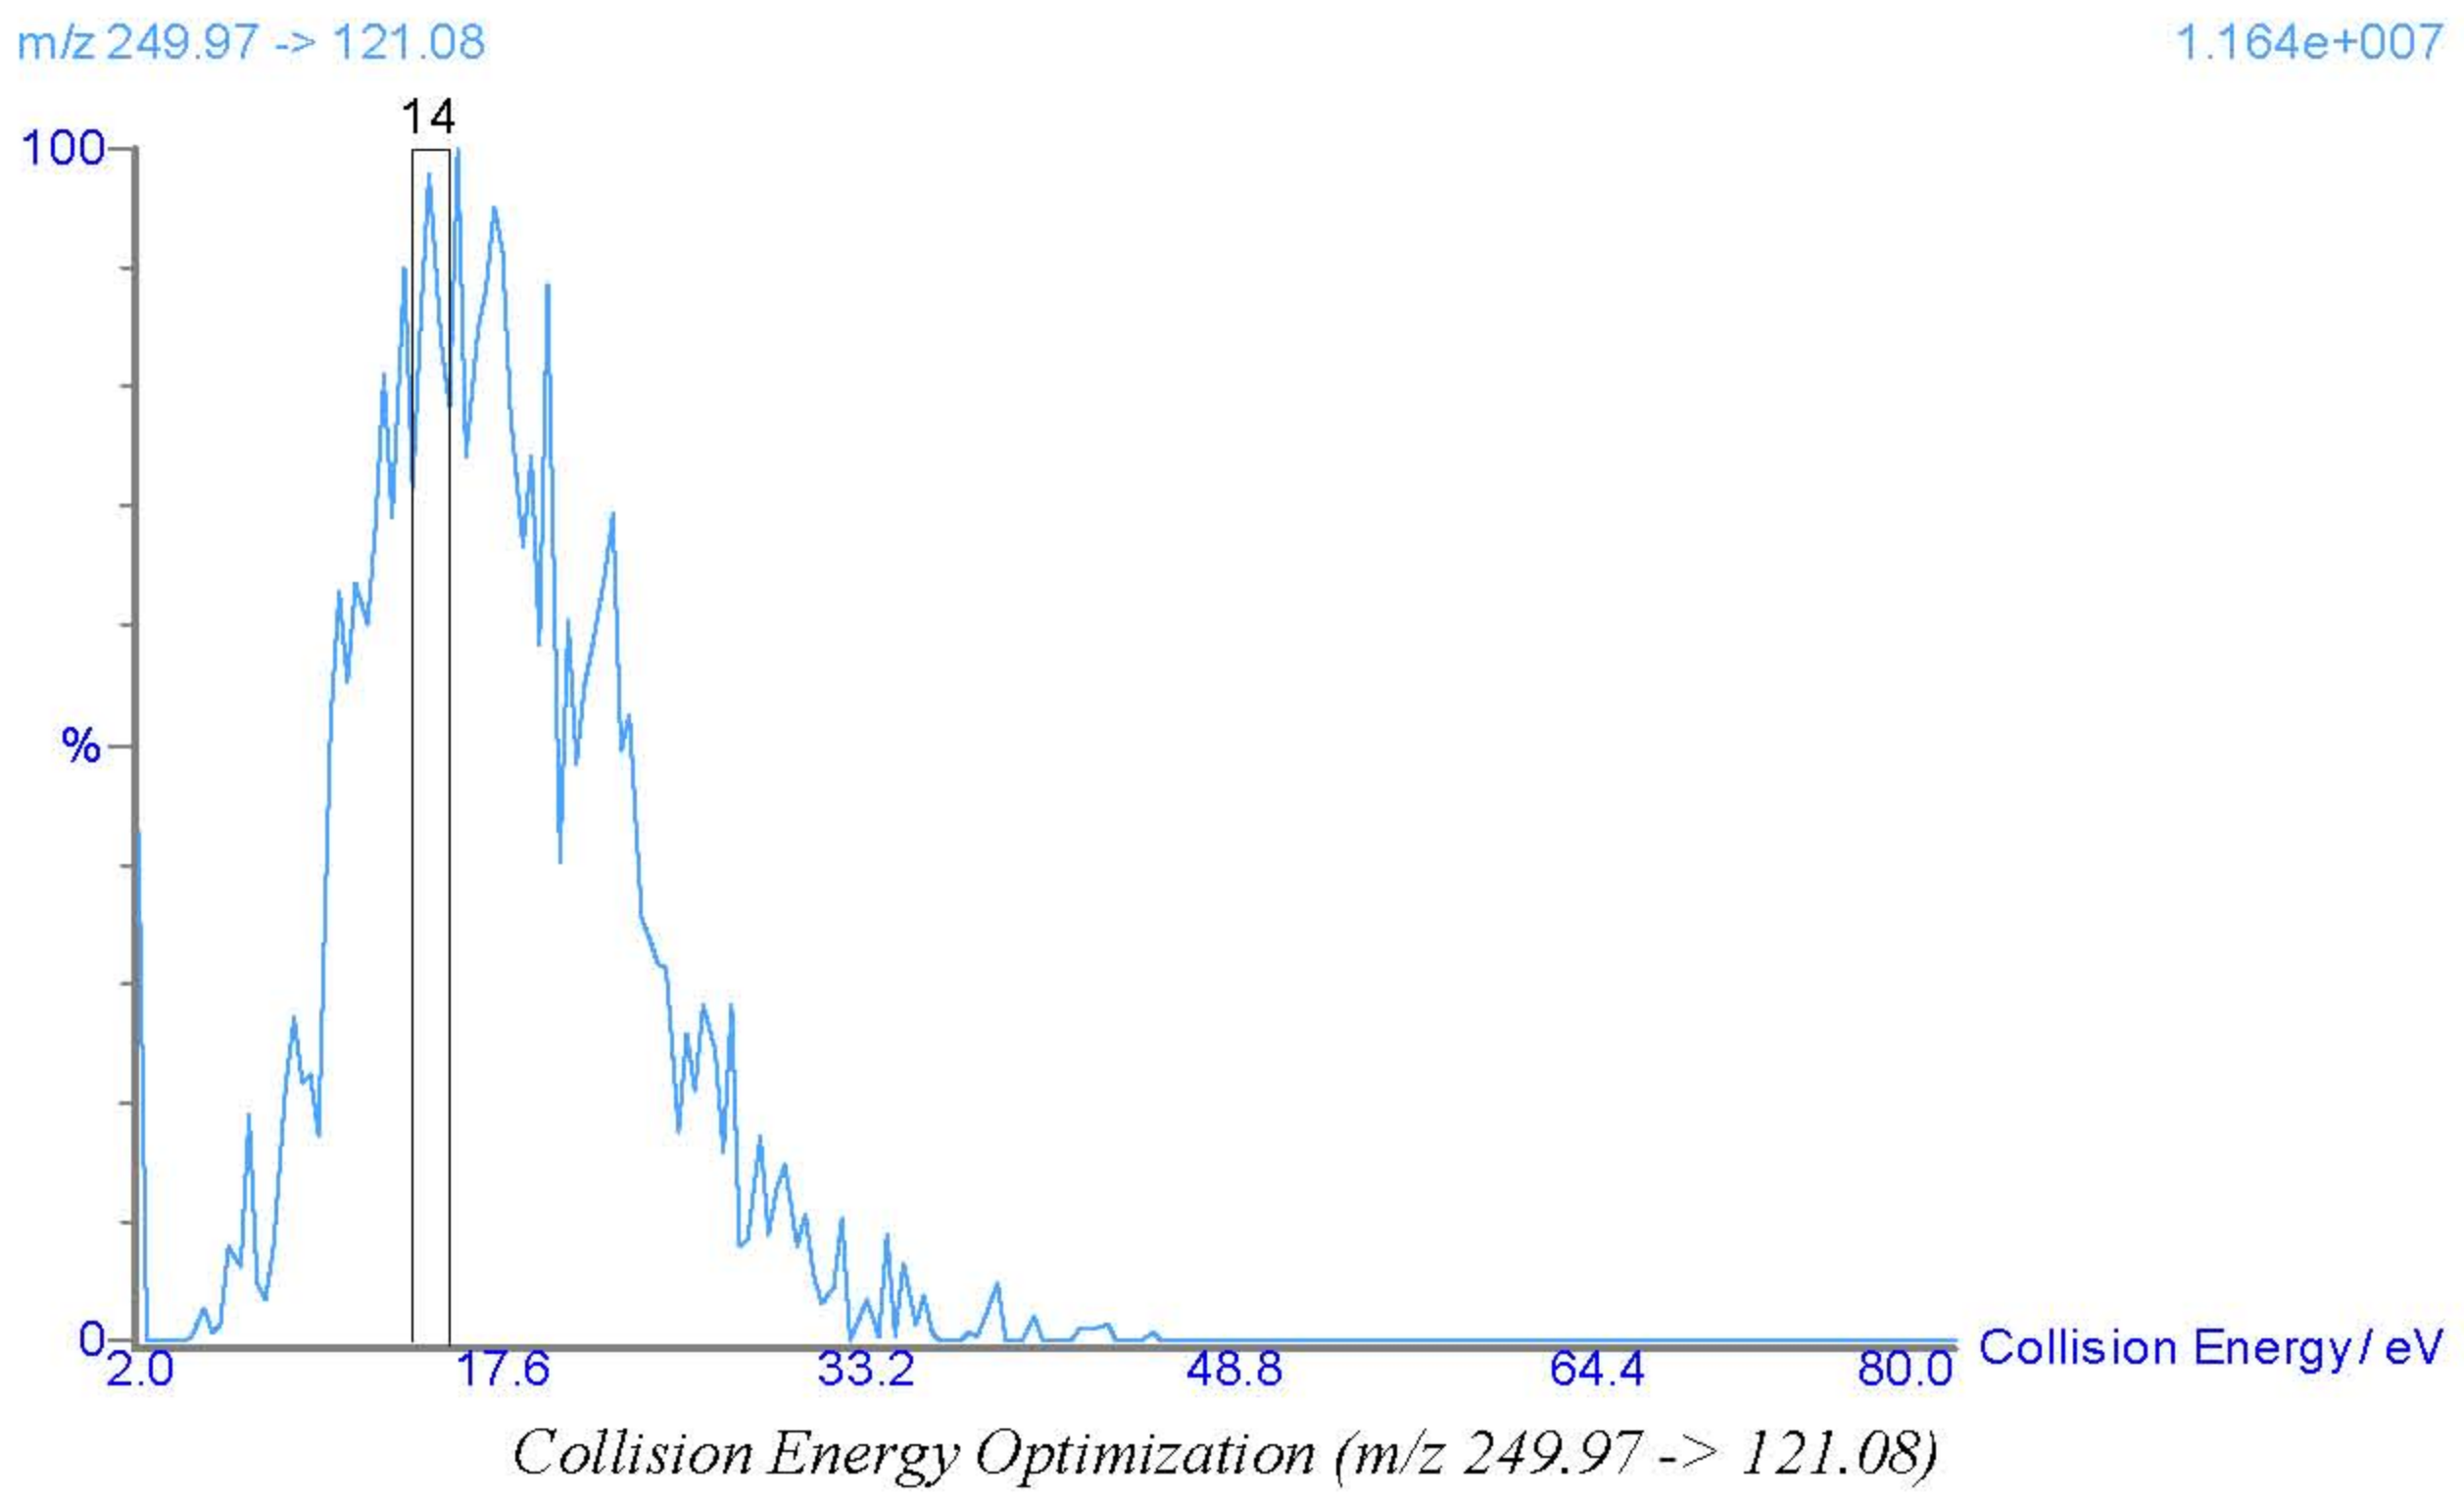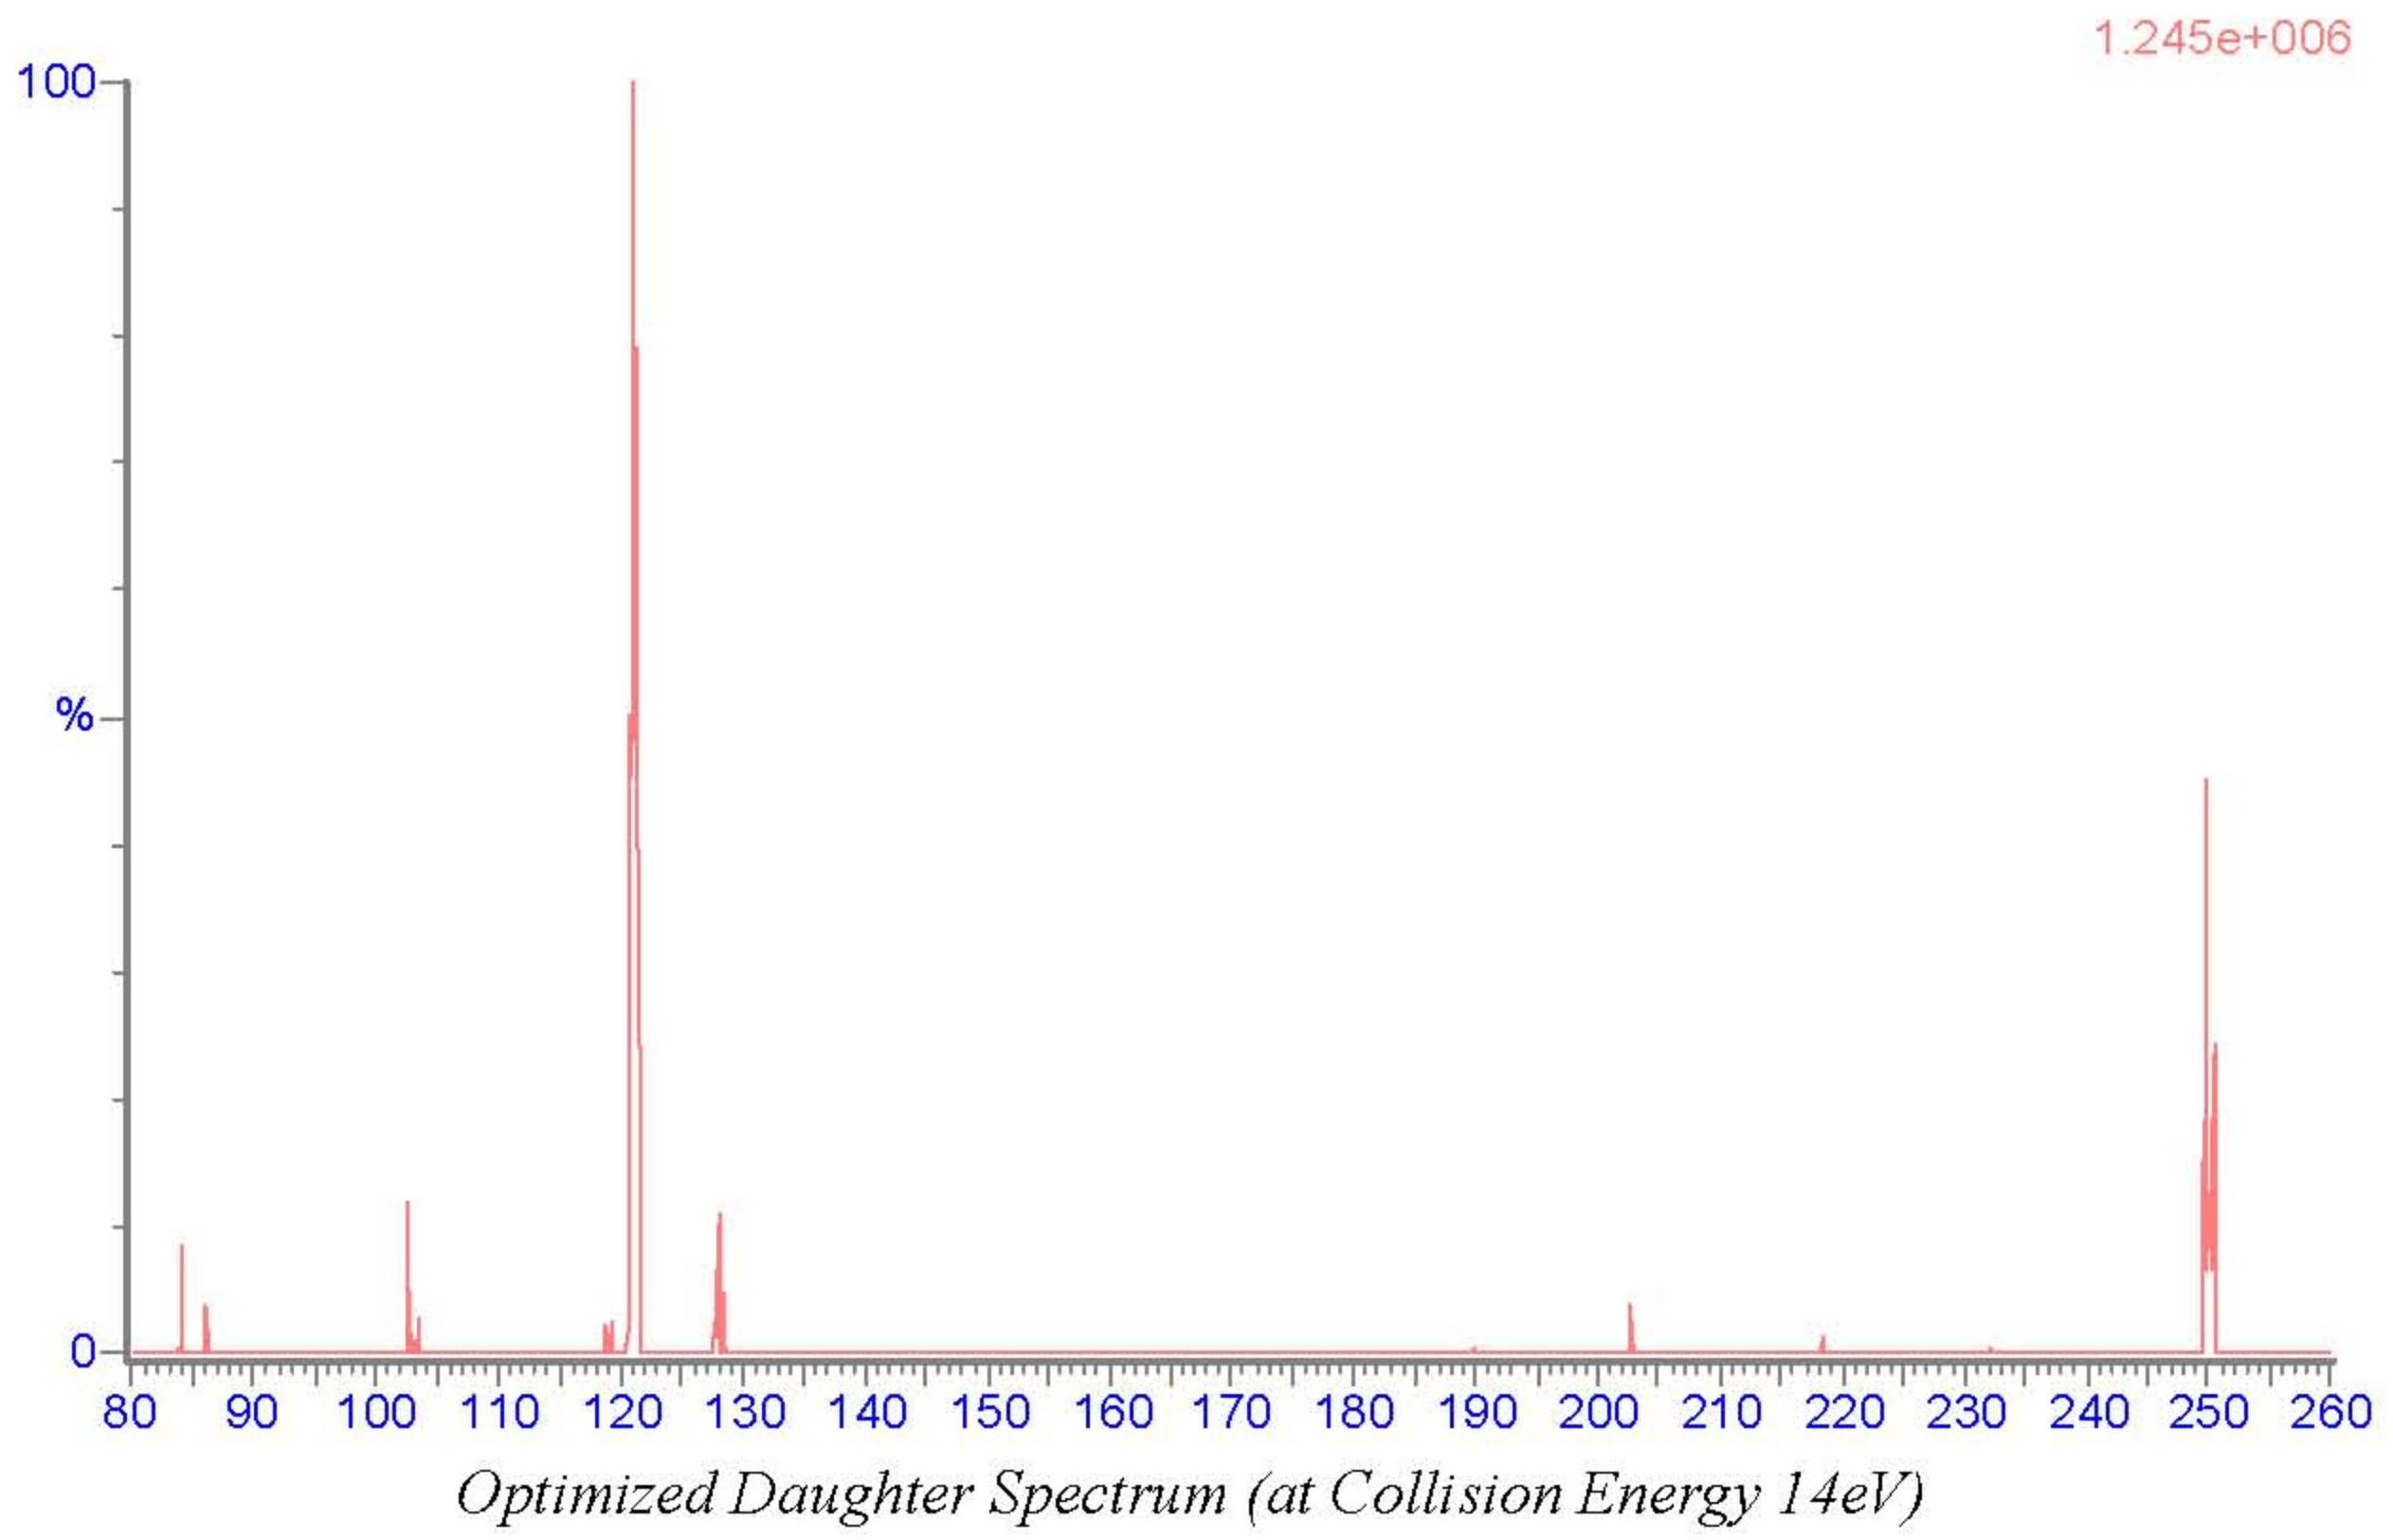

**Transition 2: ES-, m/z 249.97 -> 128.04**

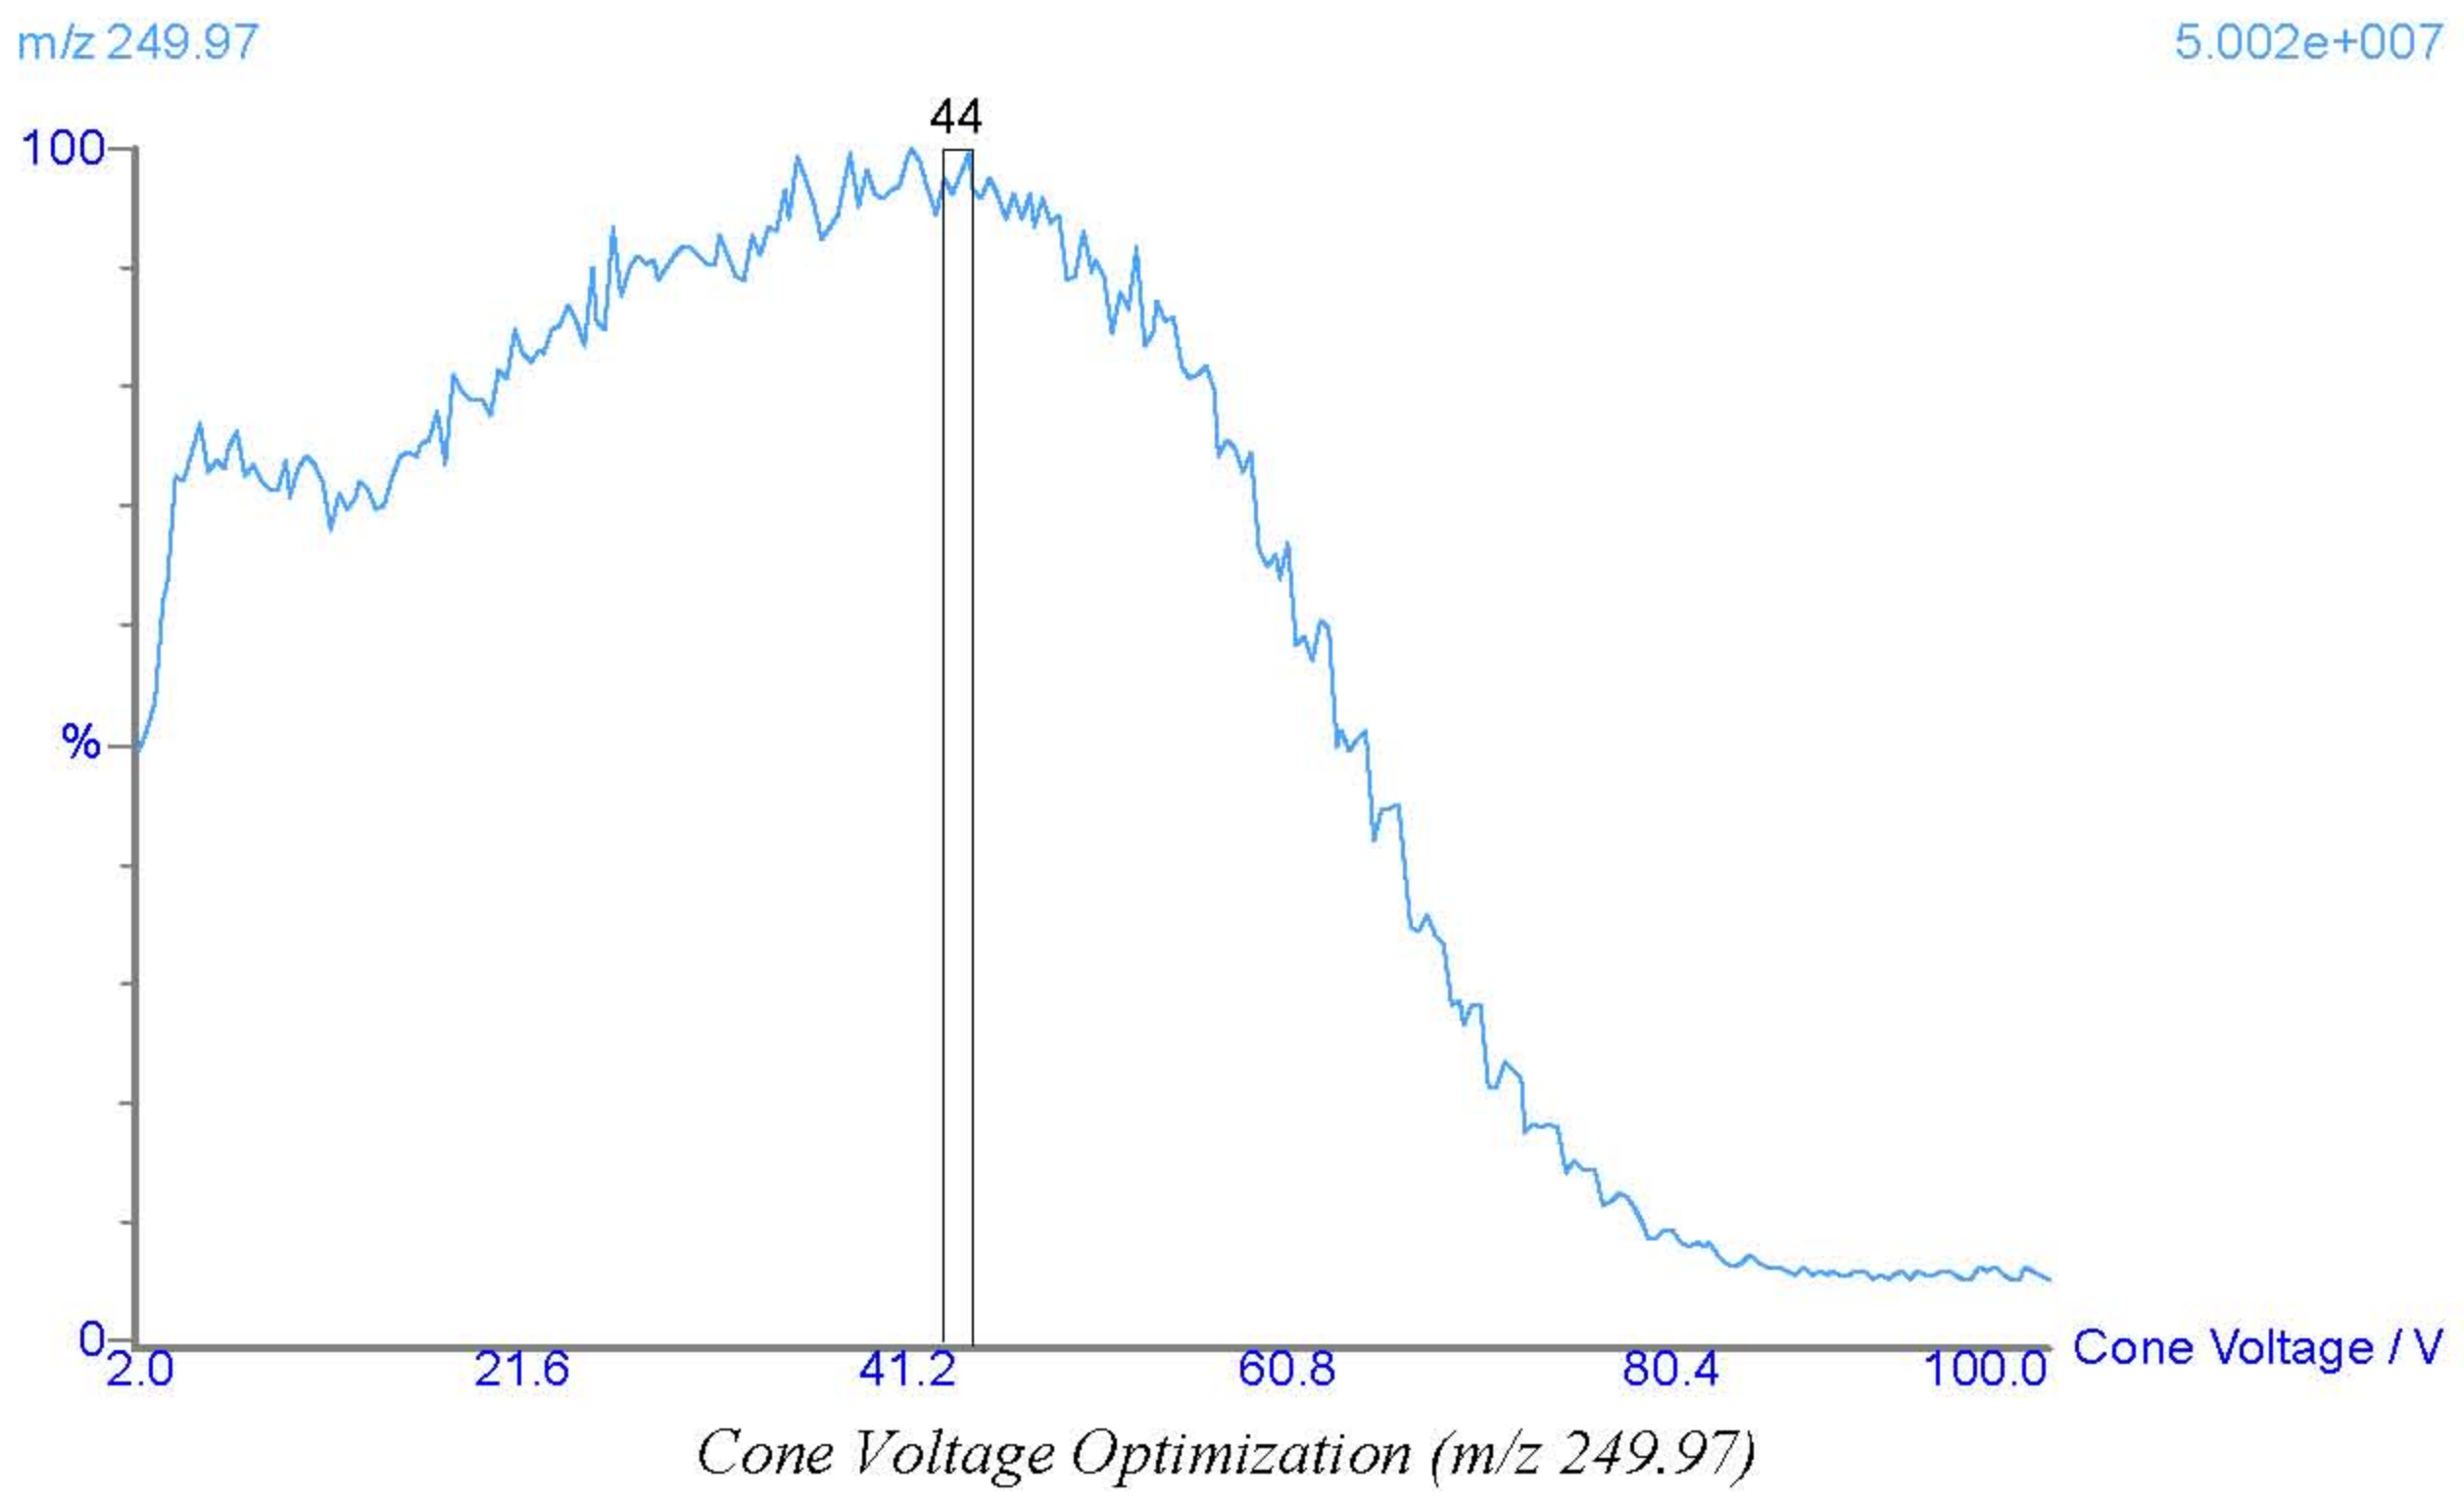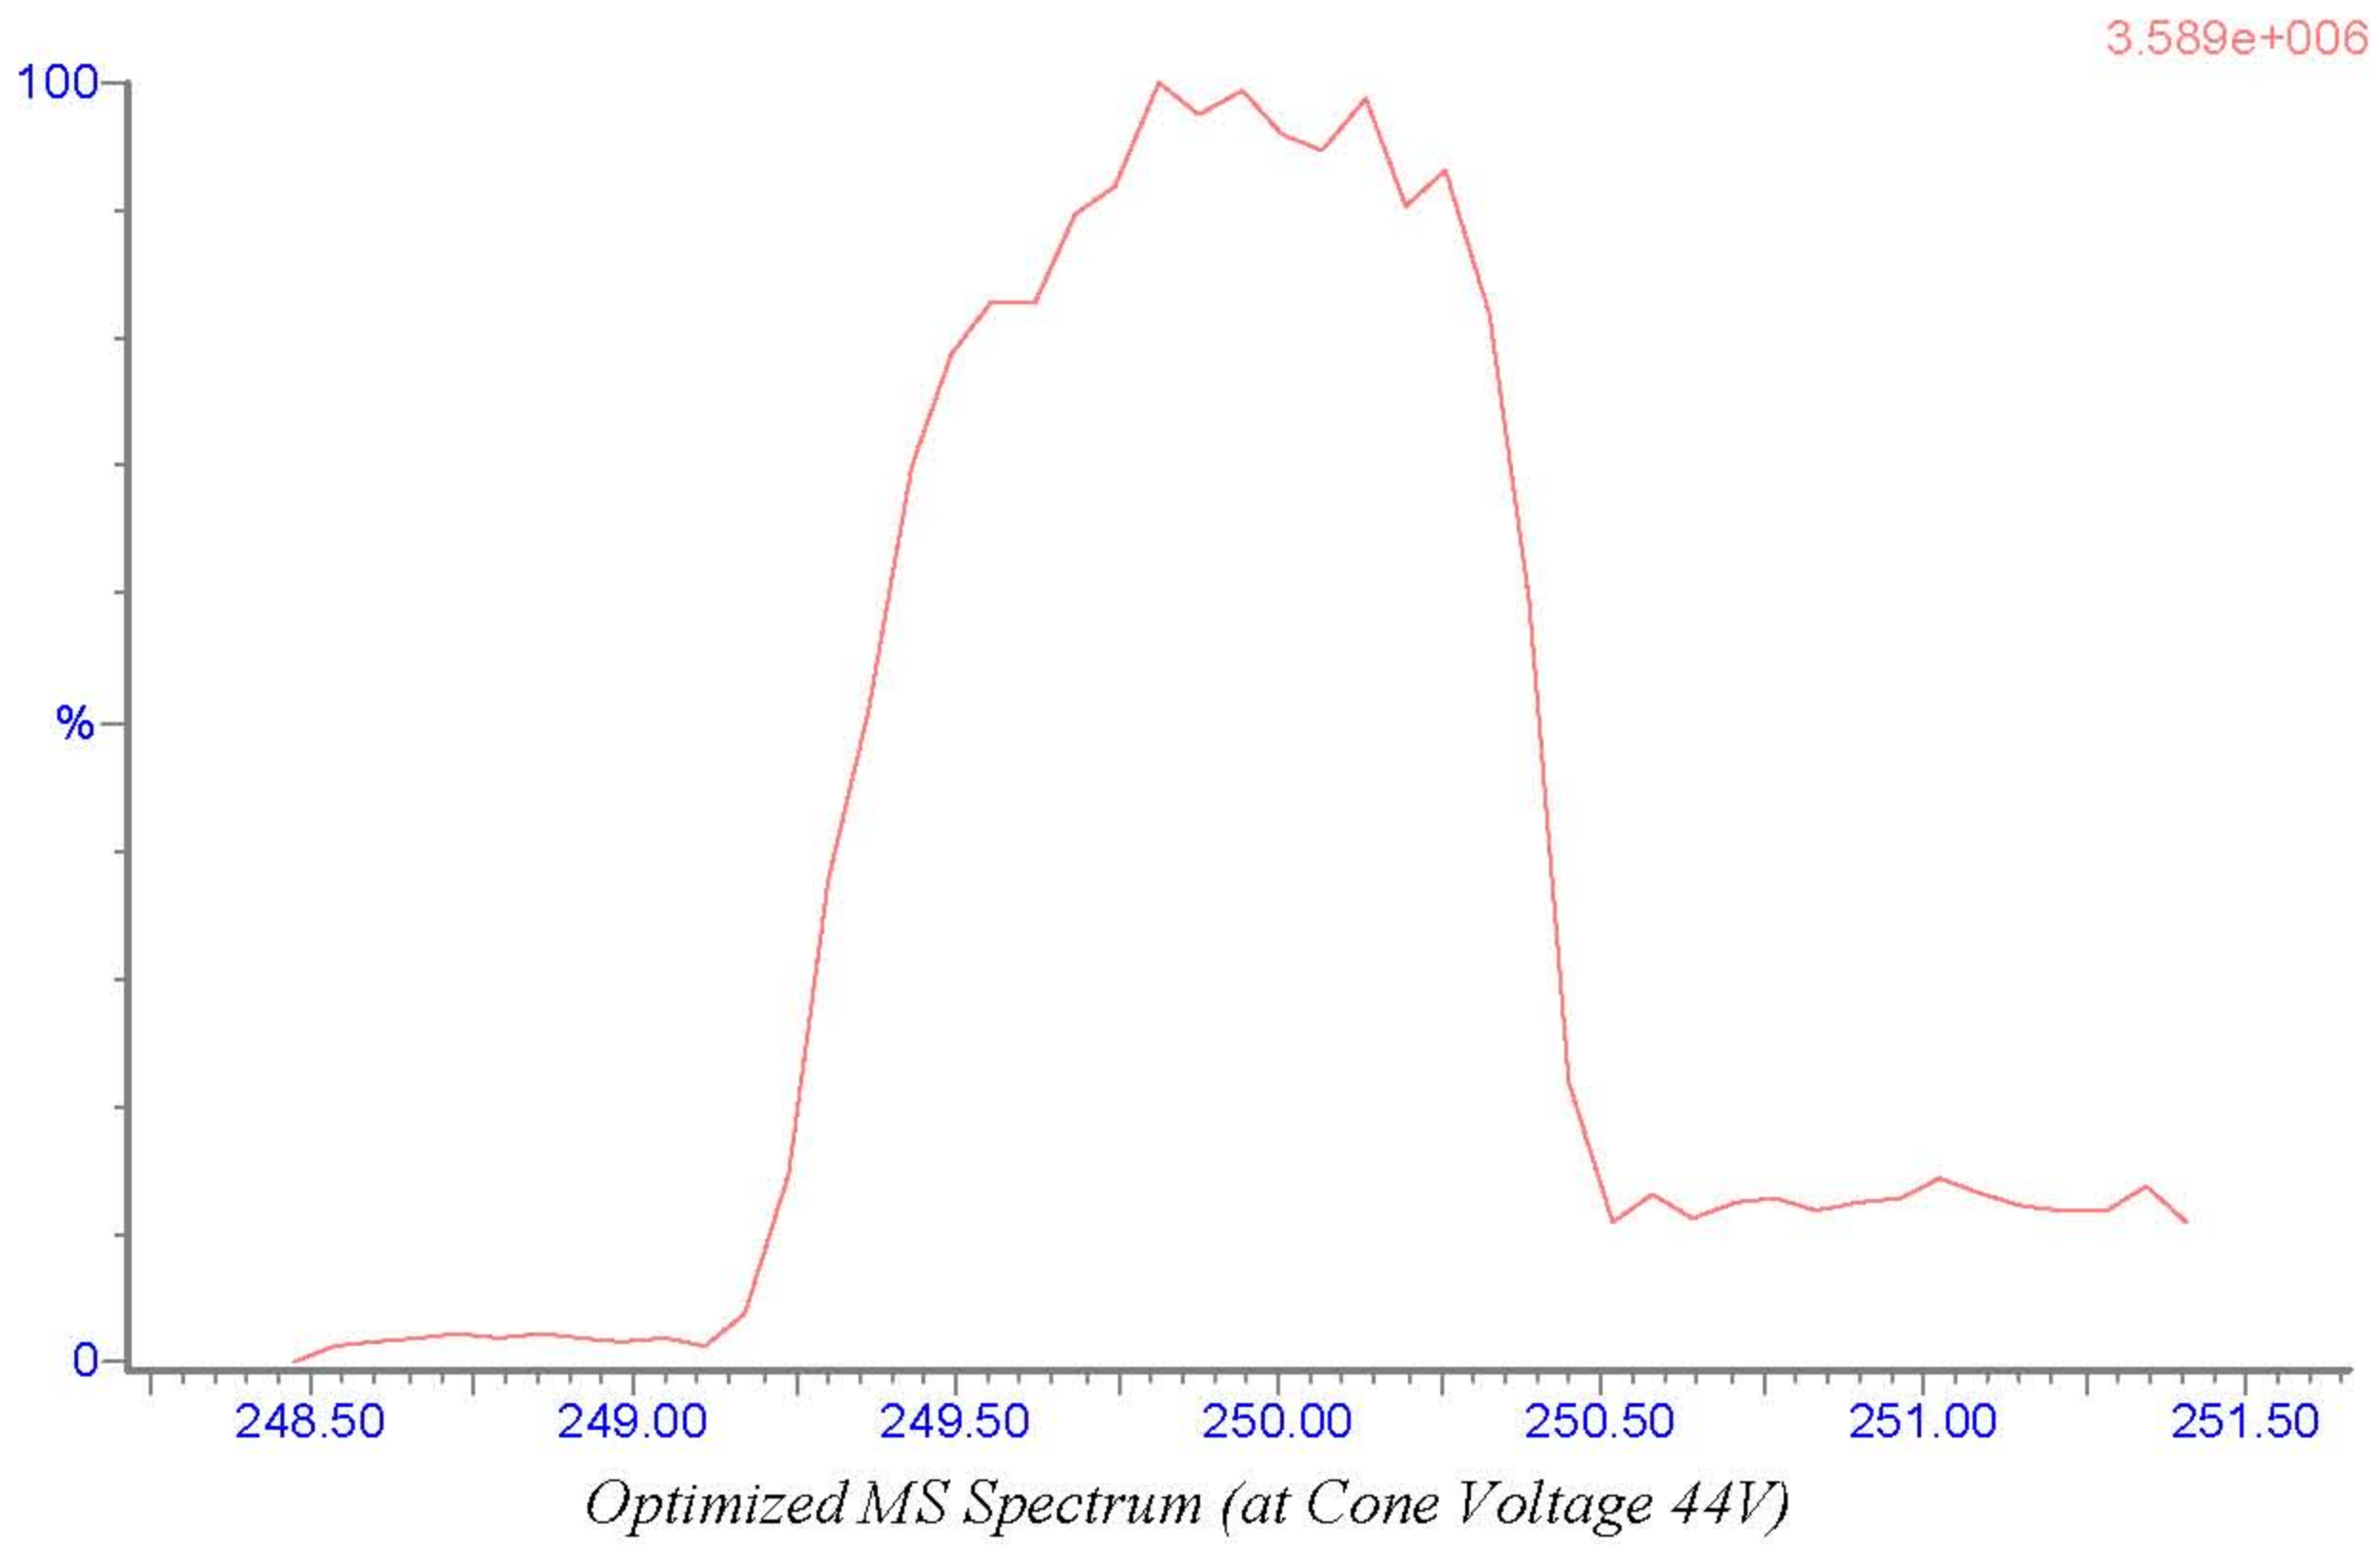

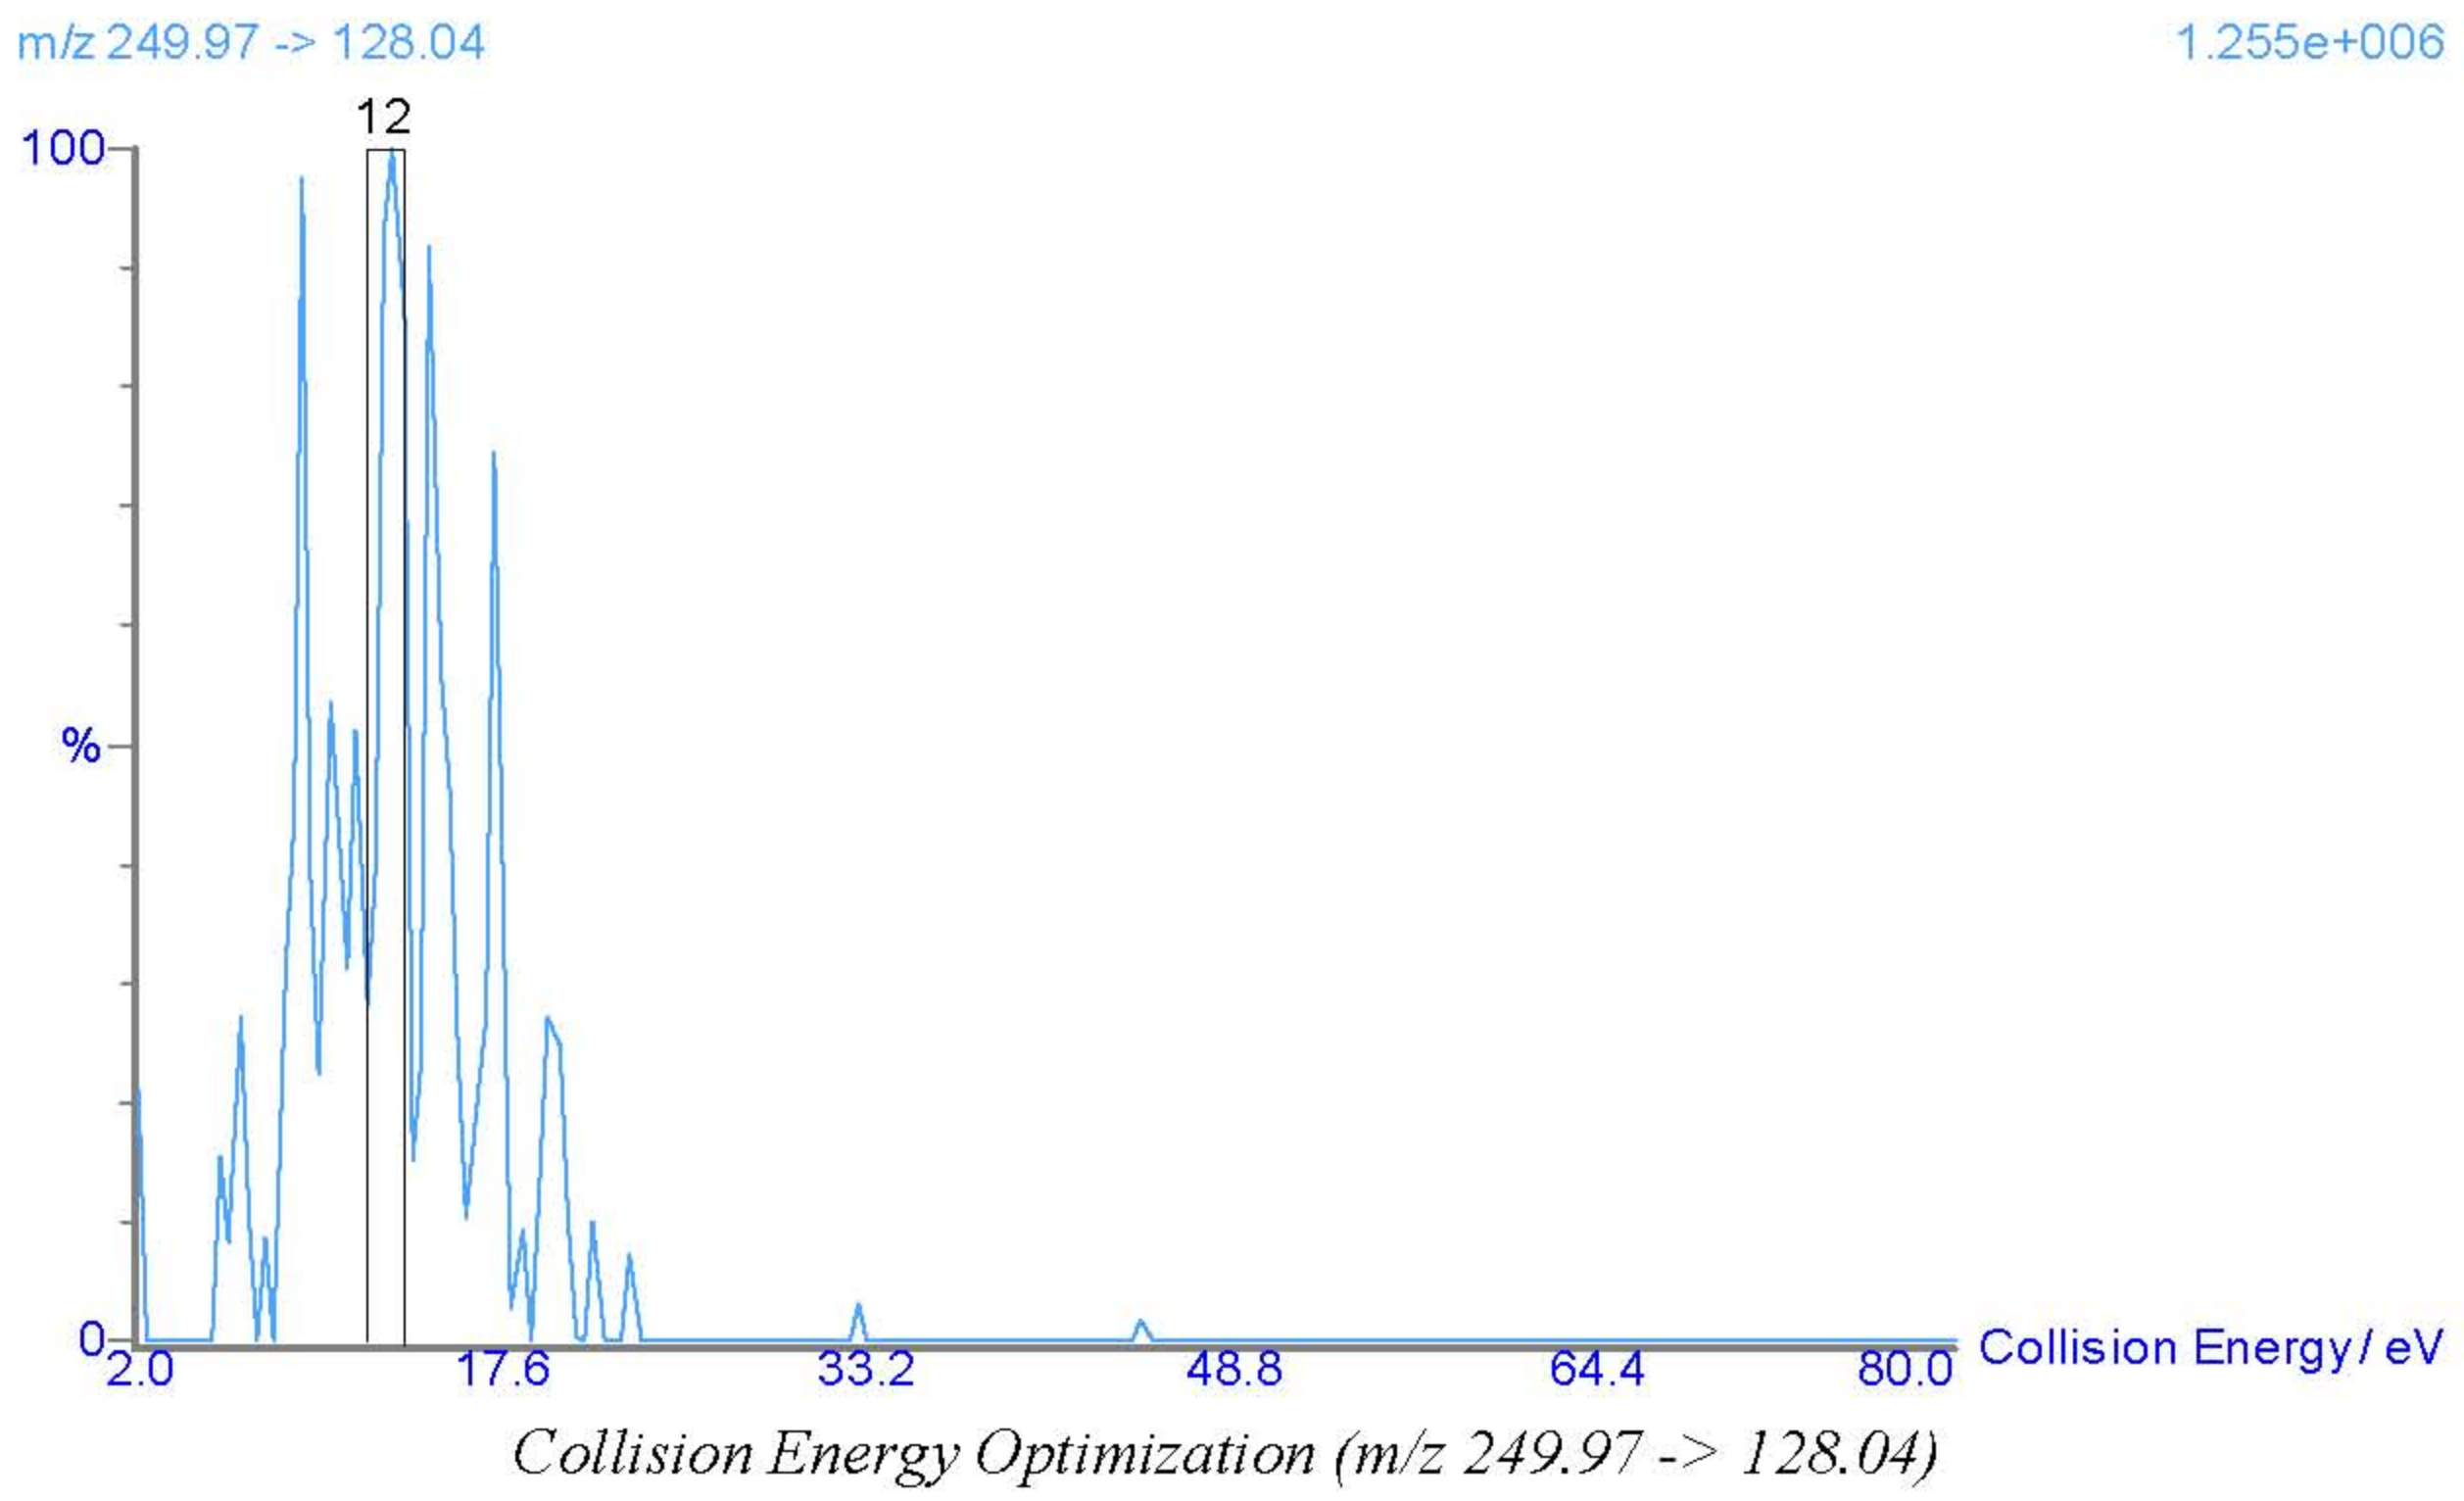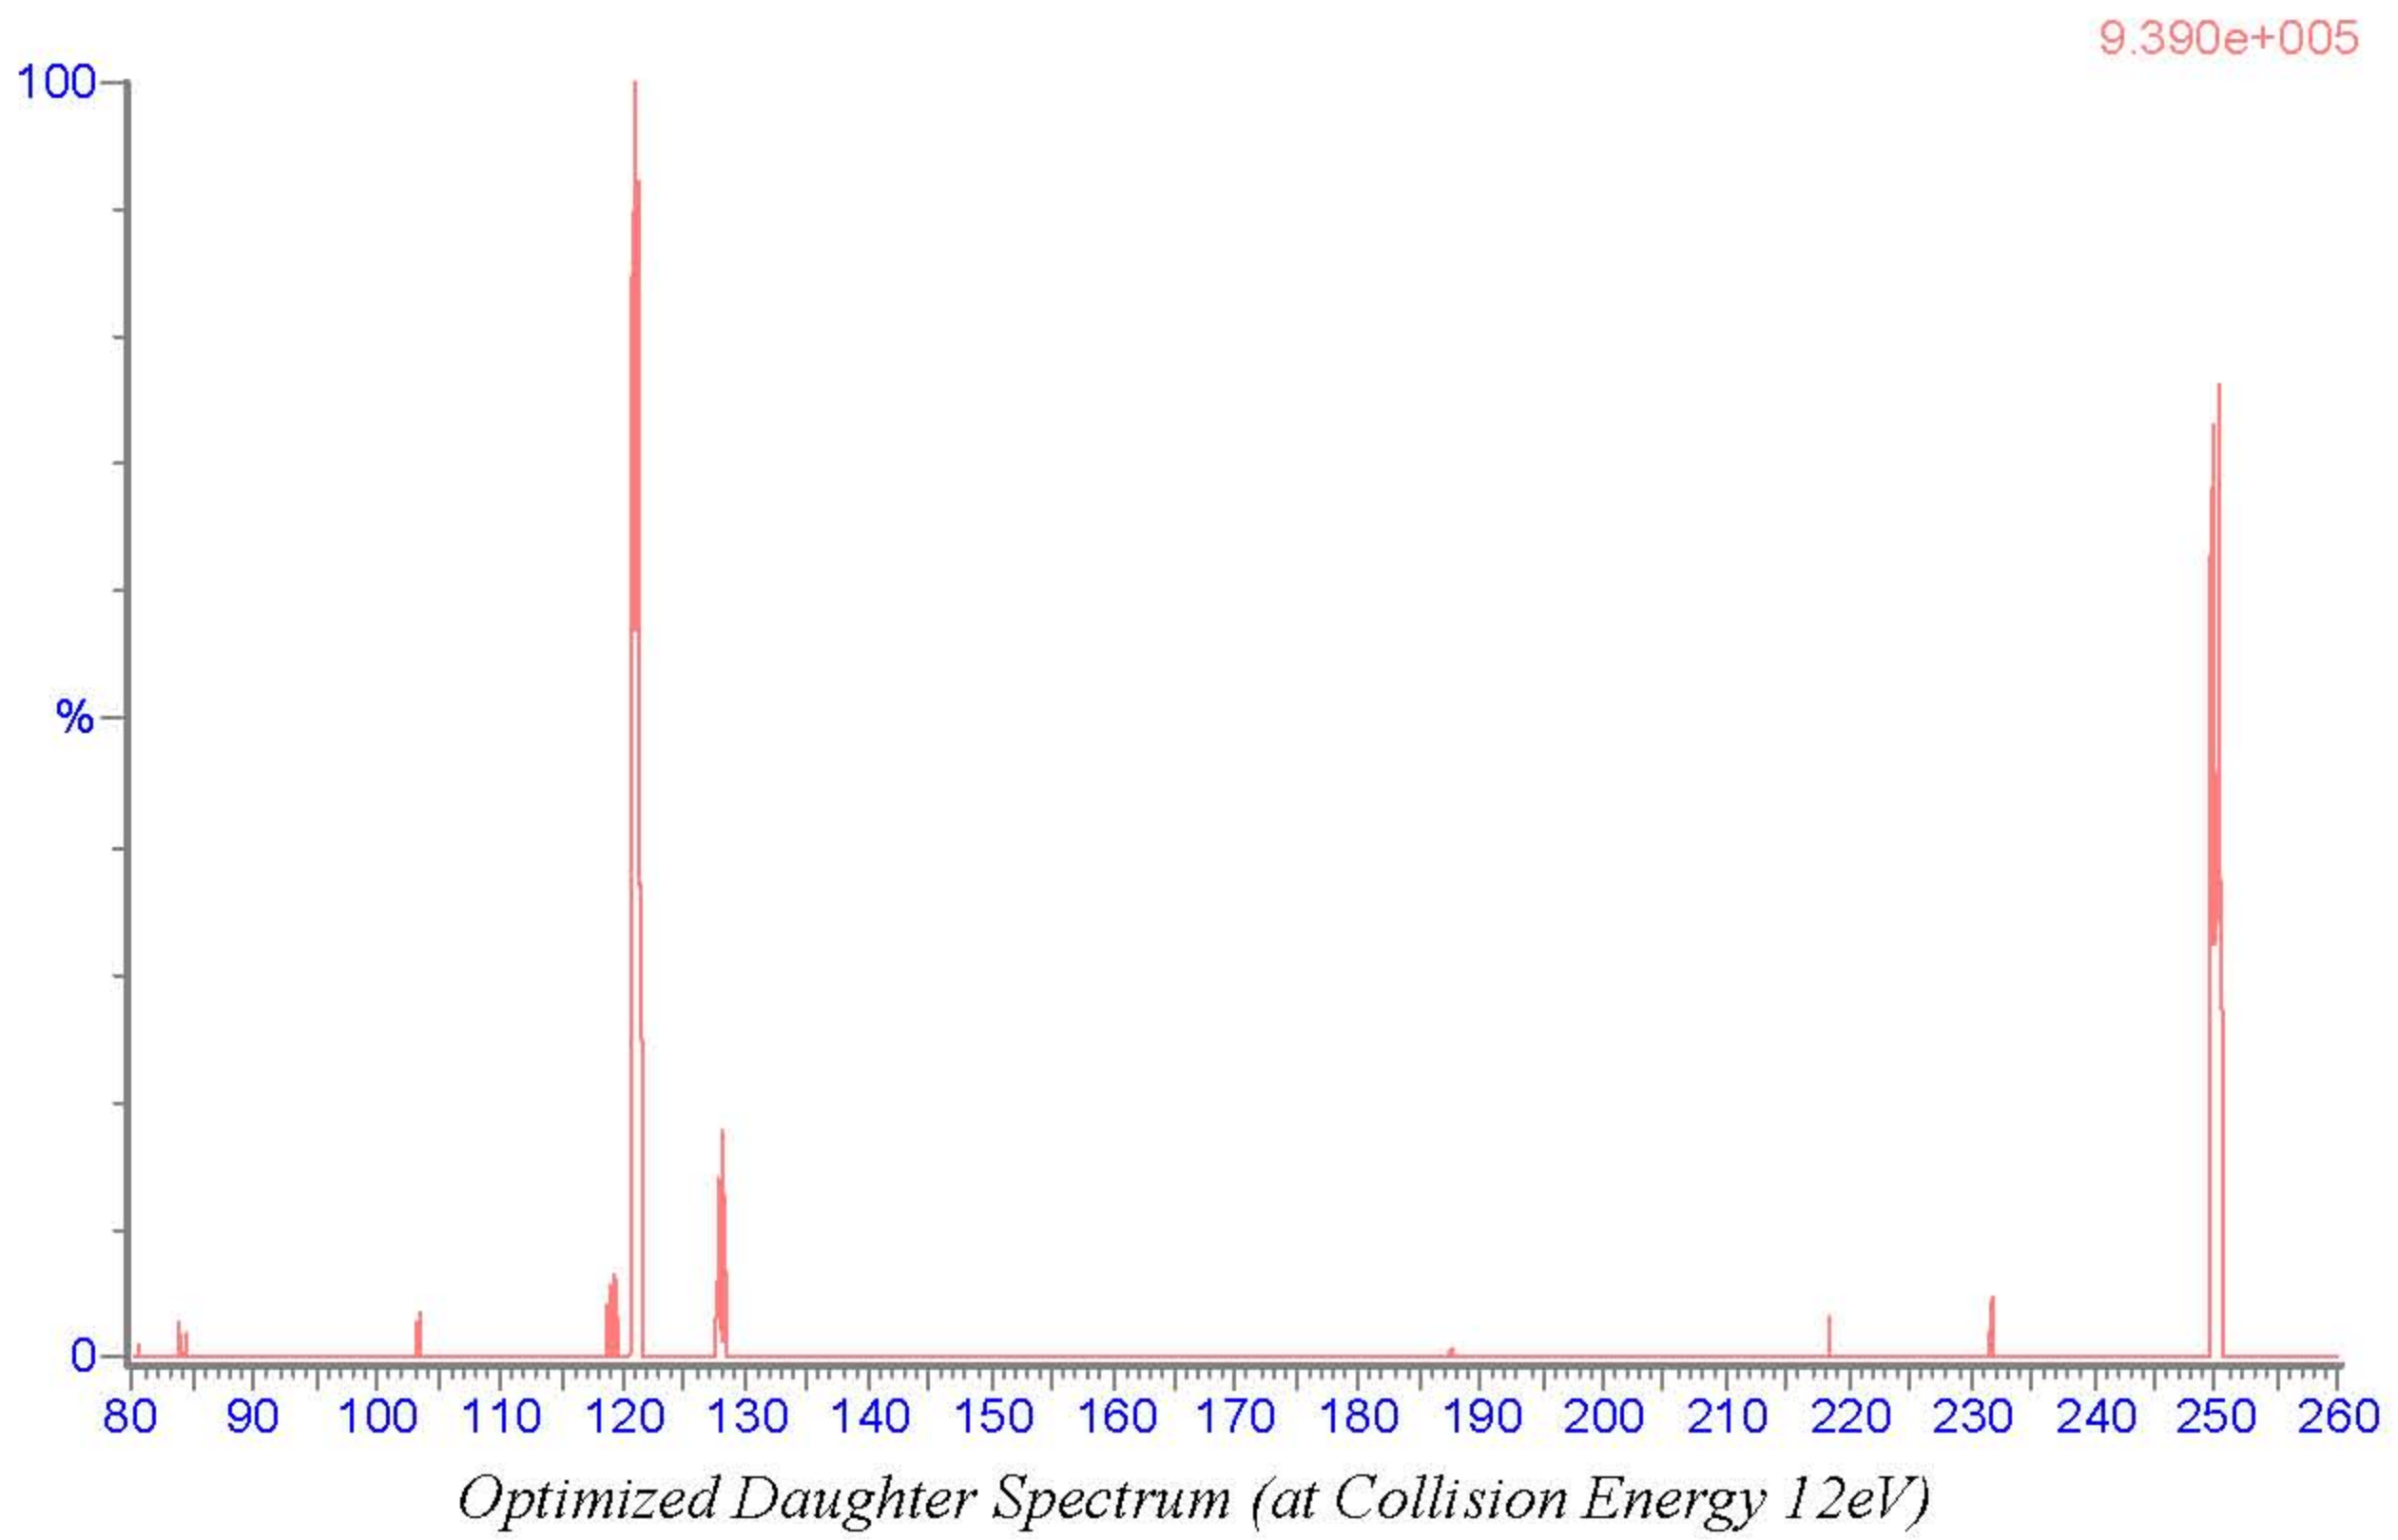

**Transition 3: ES-, m/z 249.97 -> 103.04**

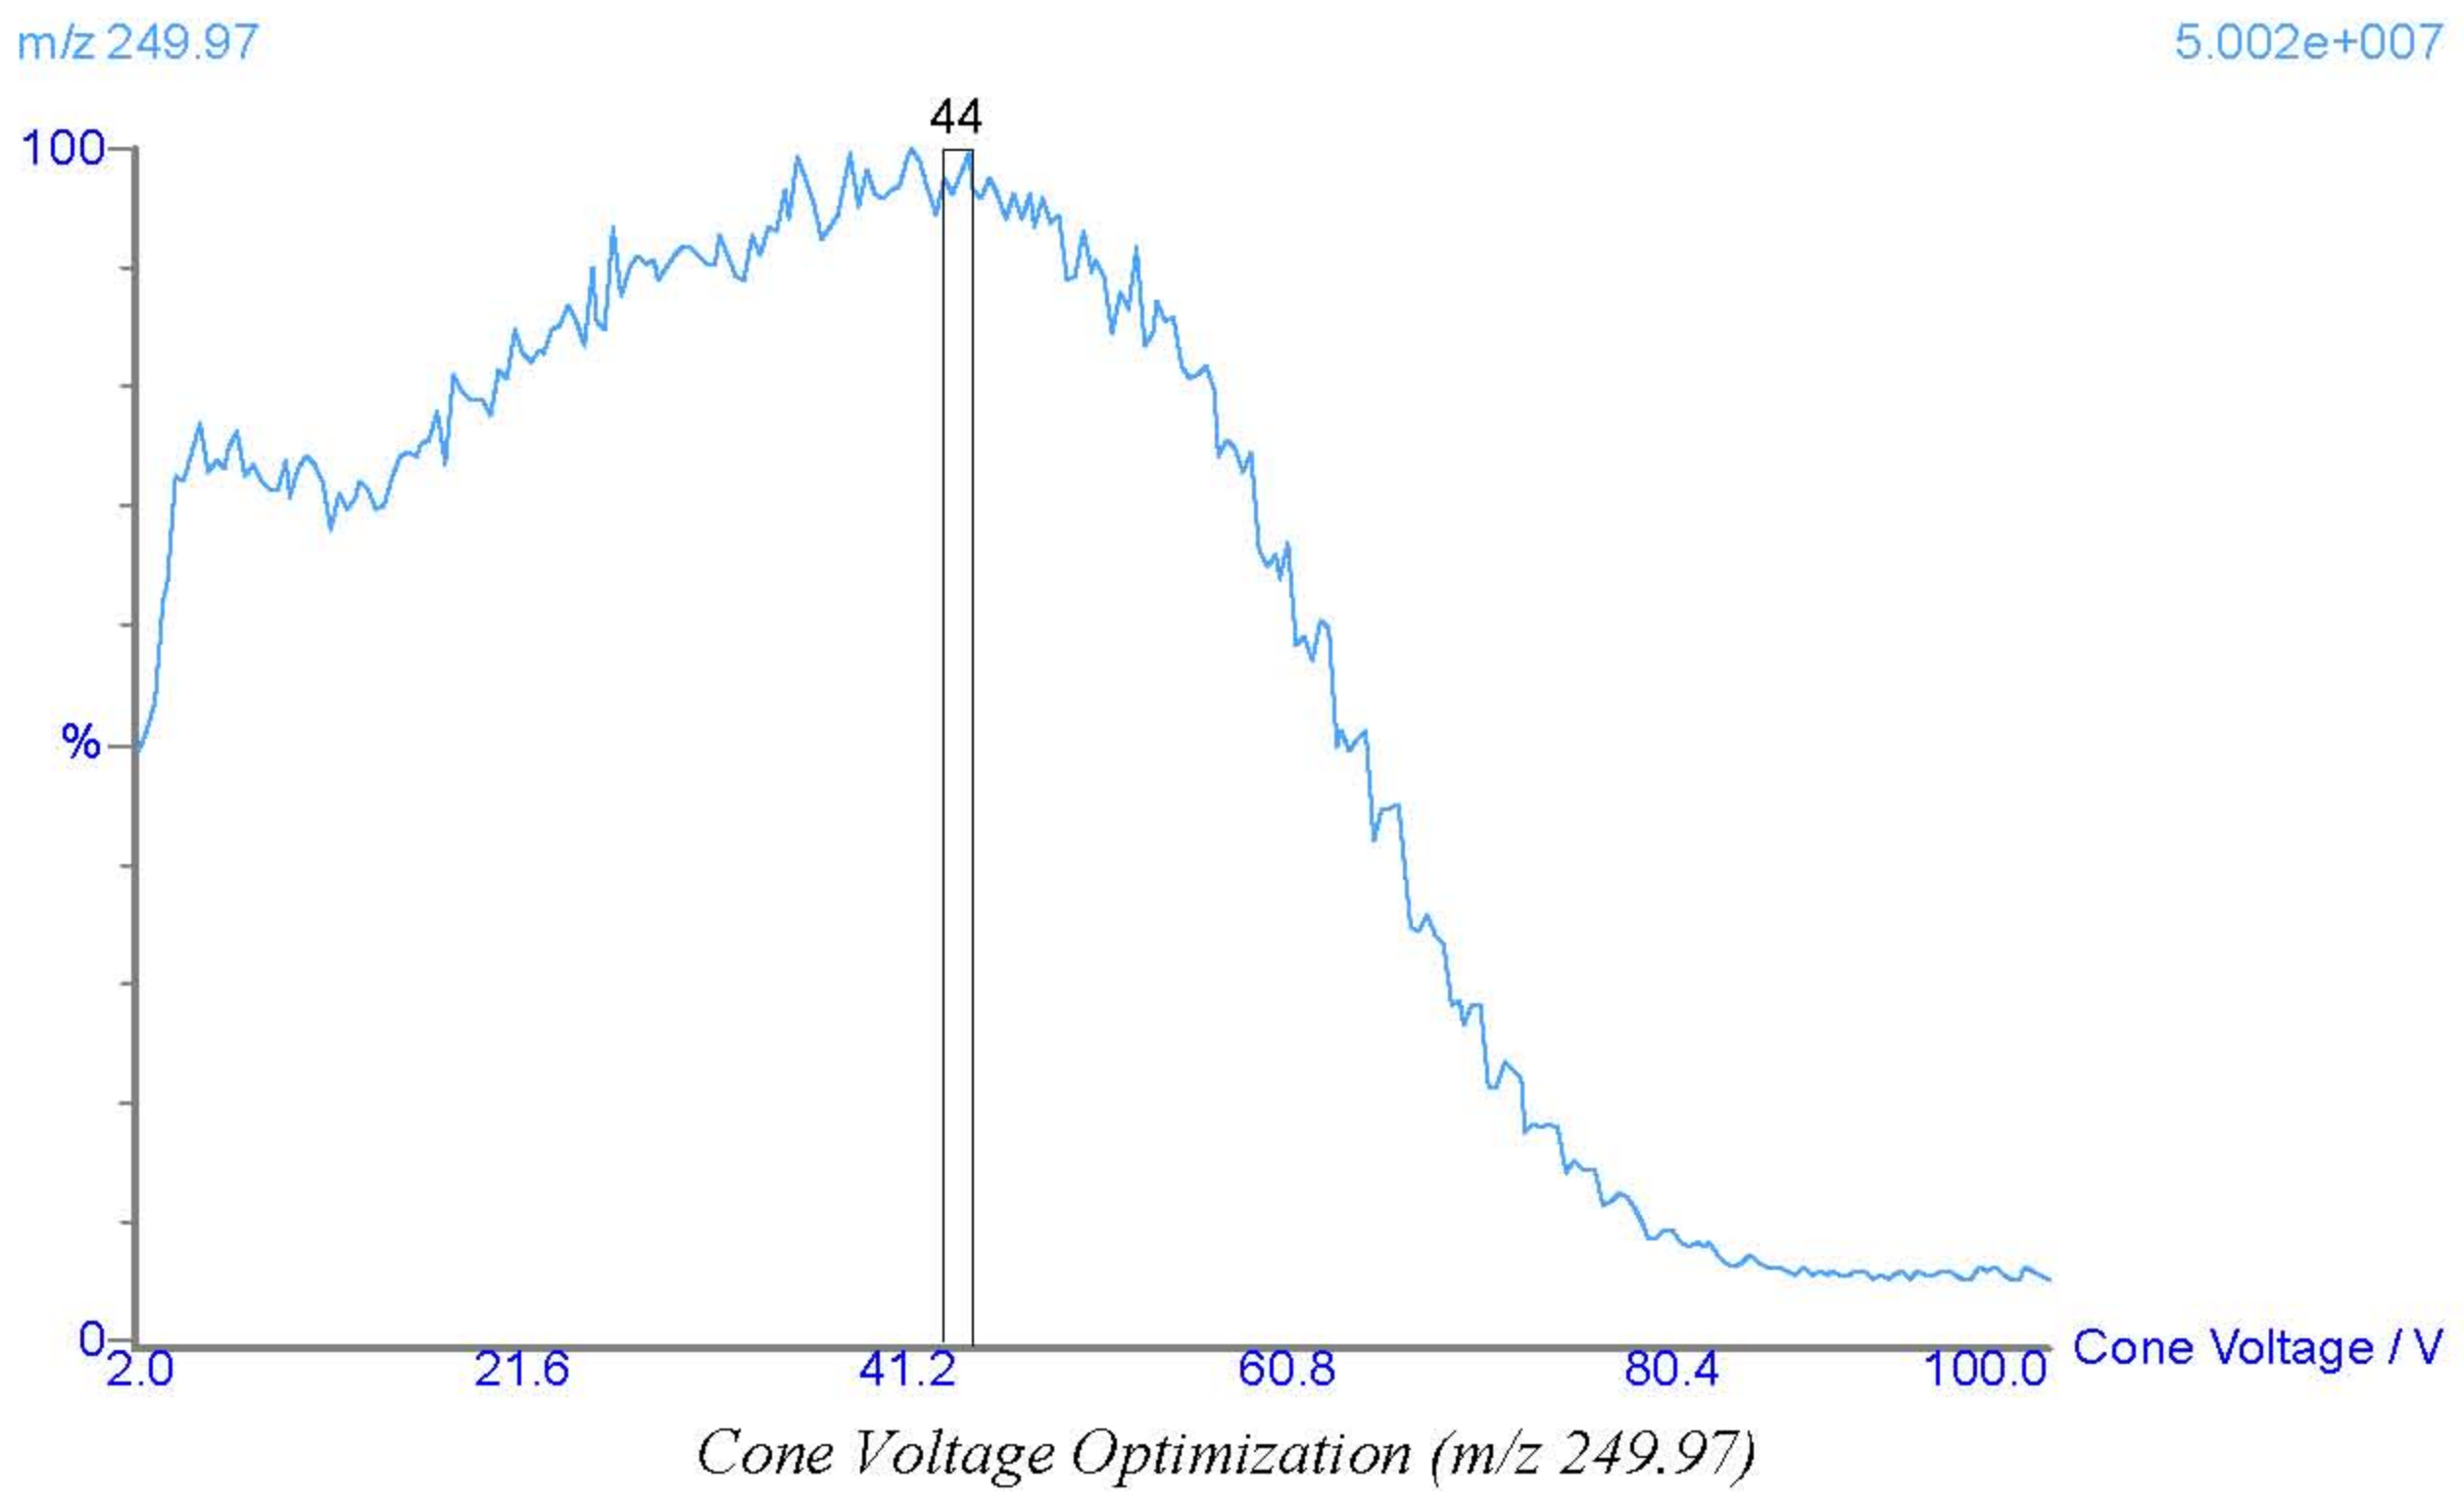

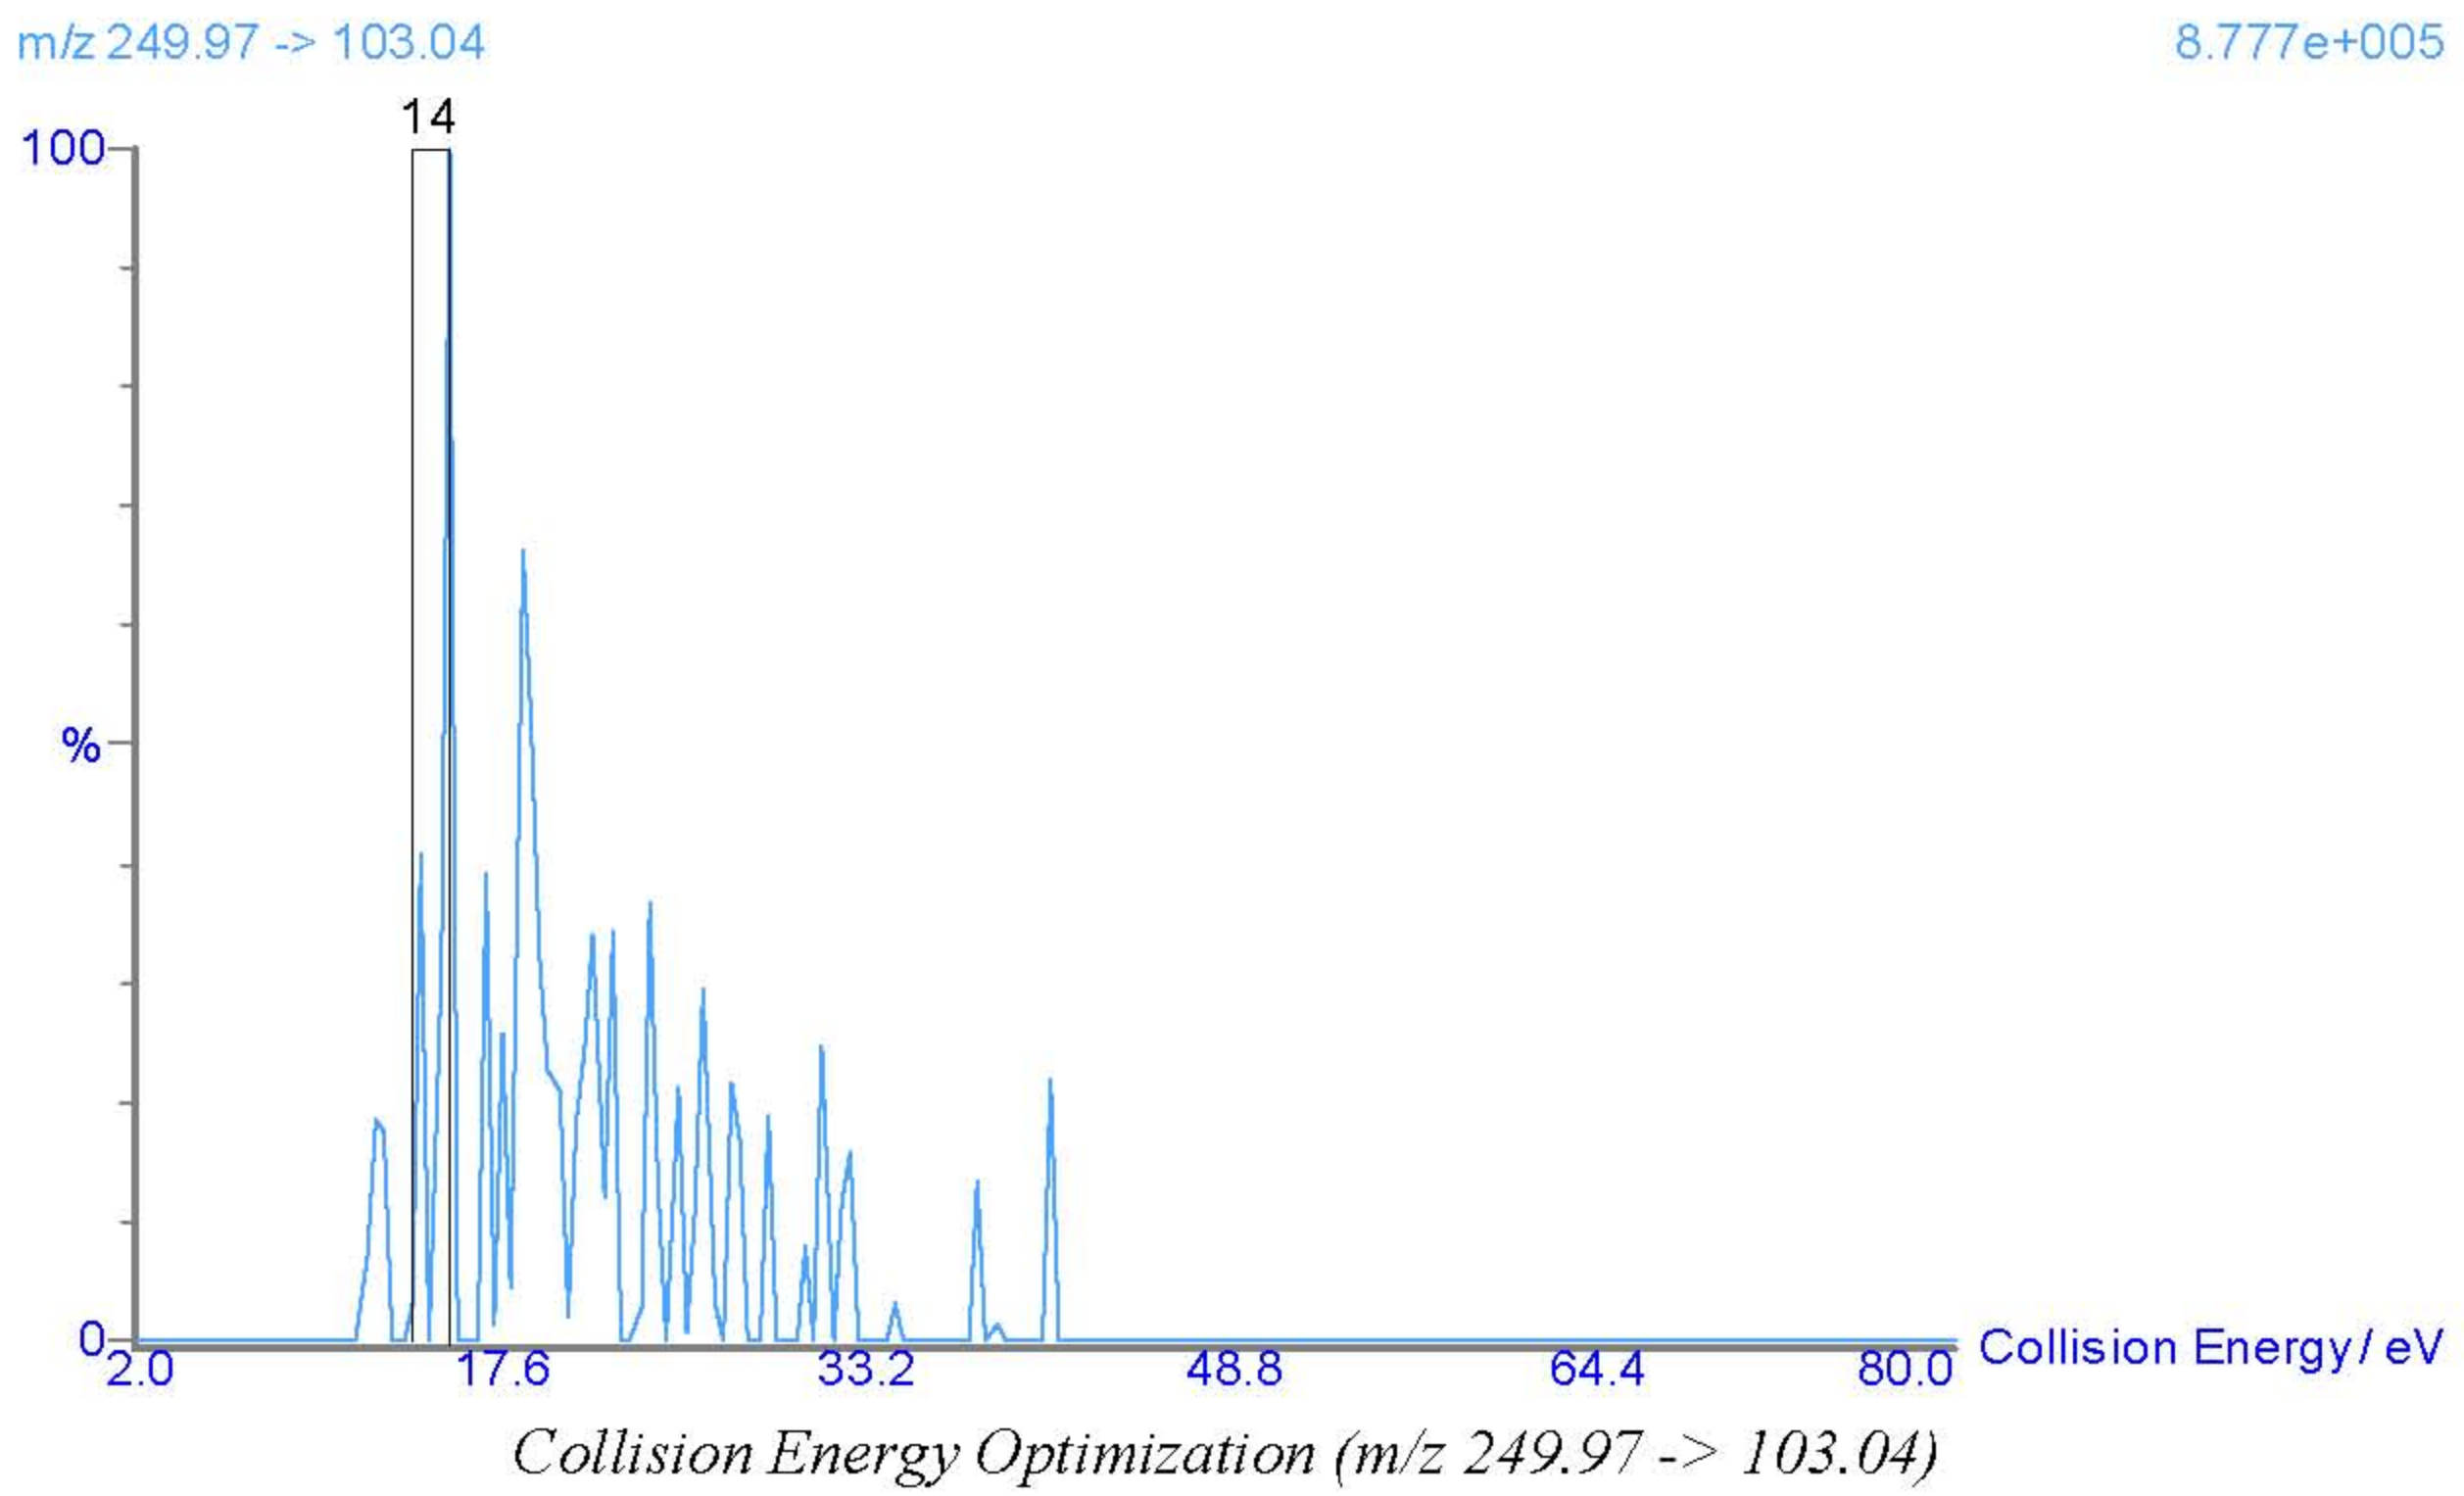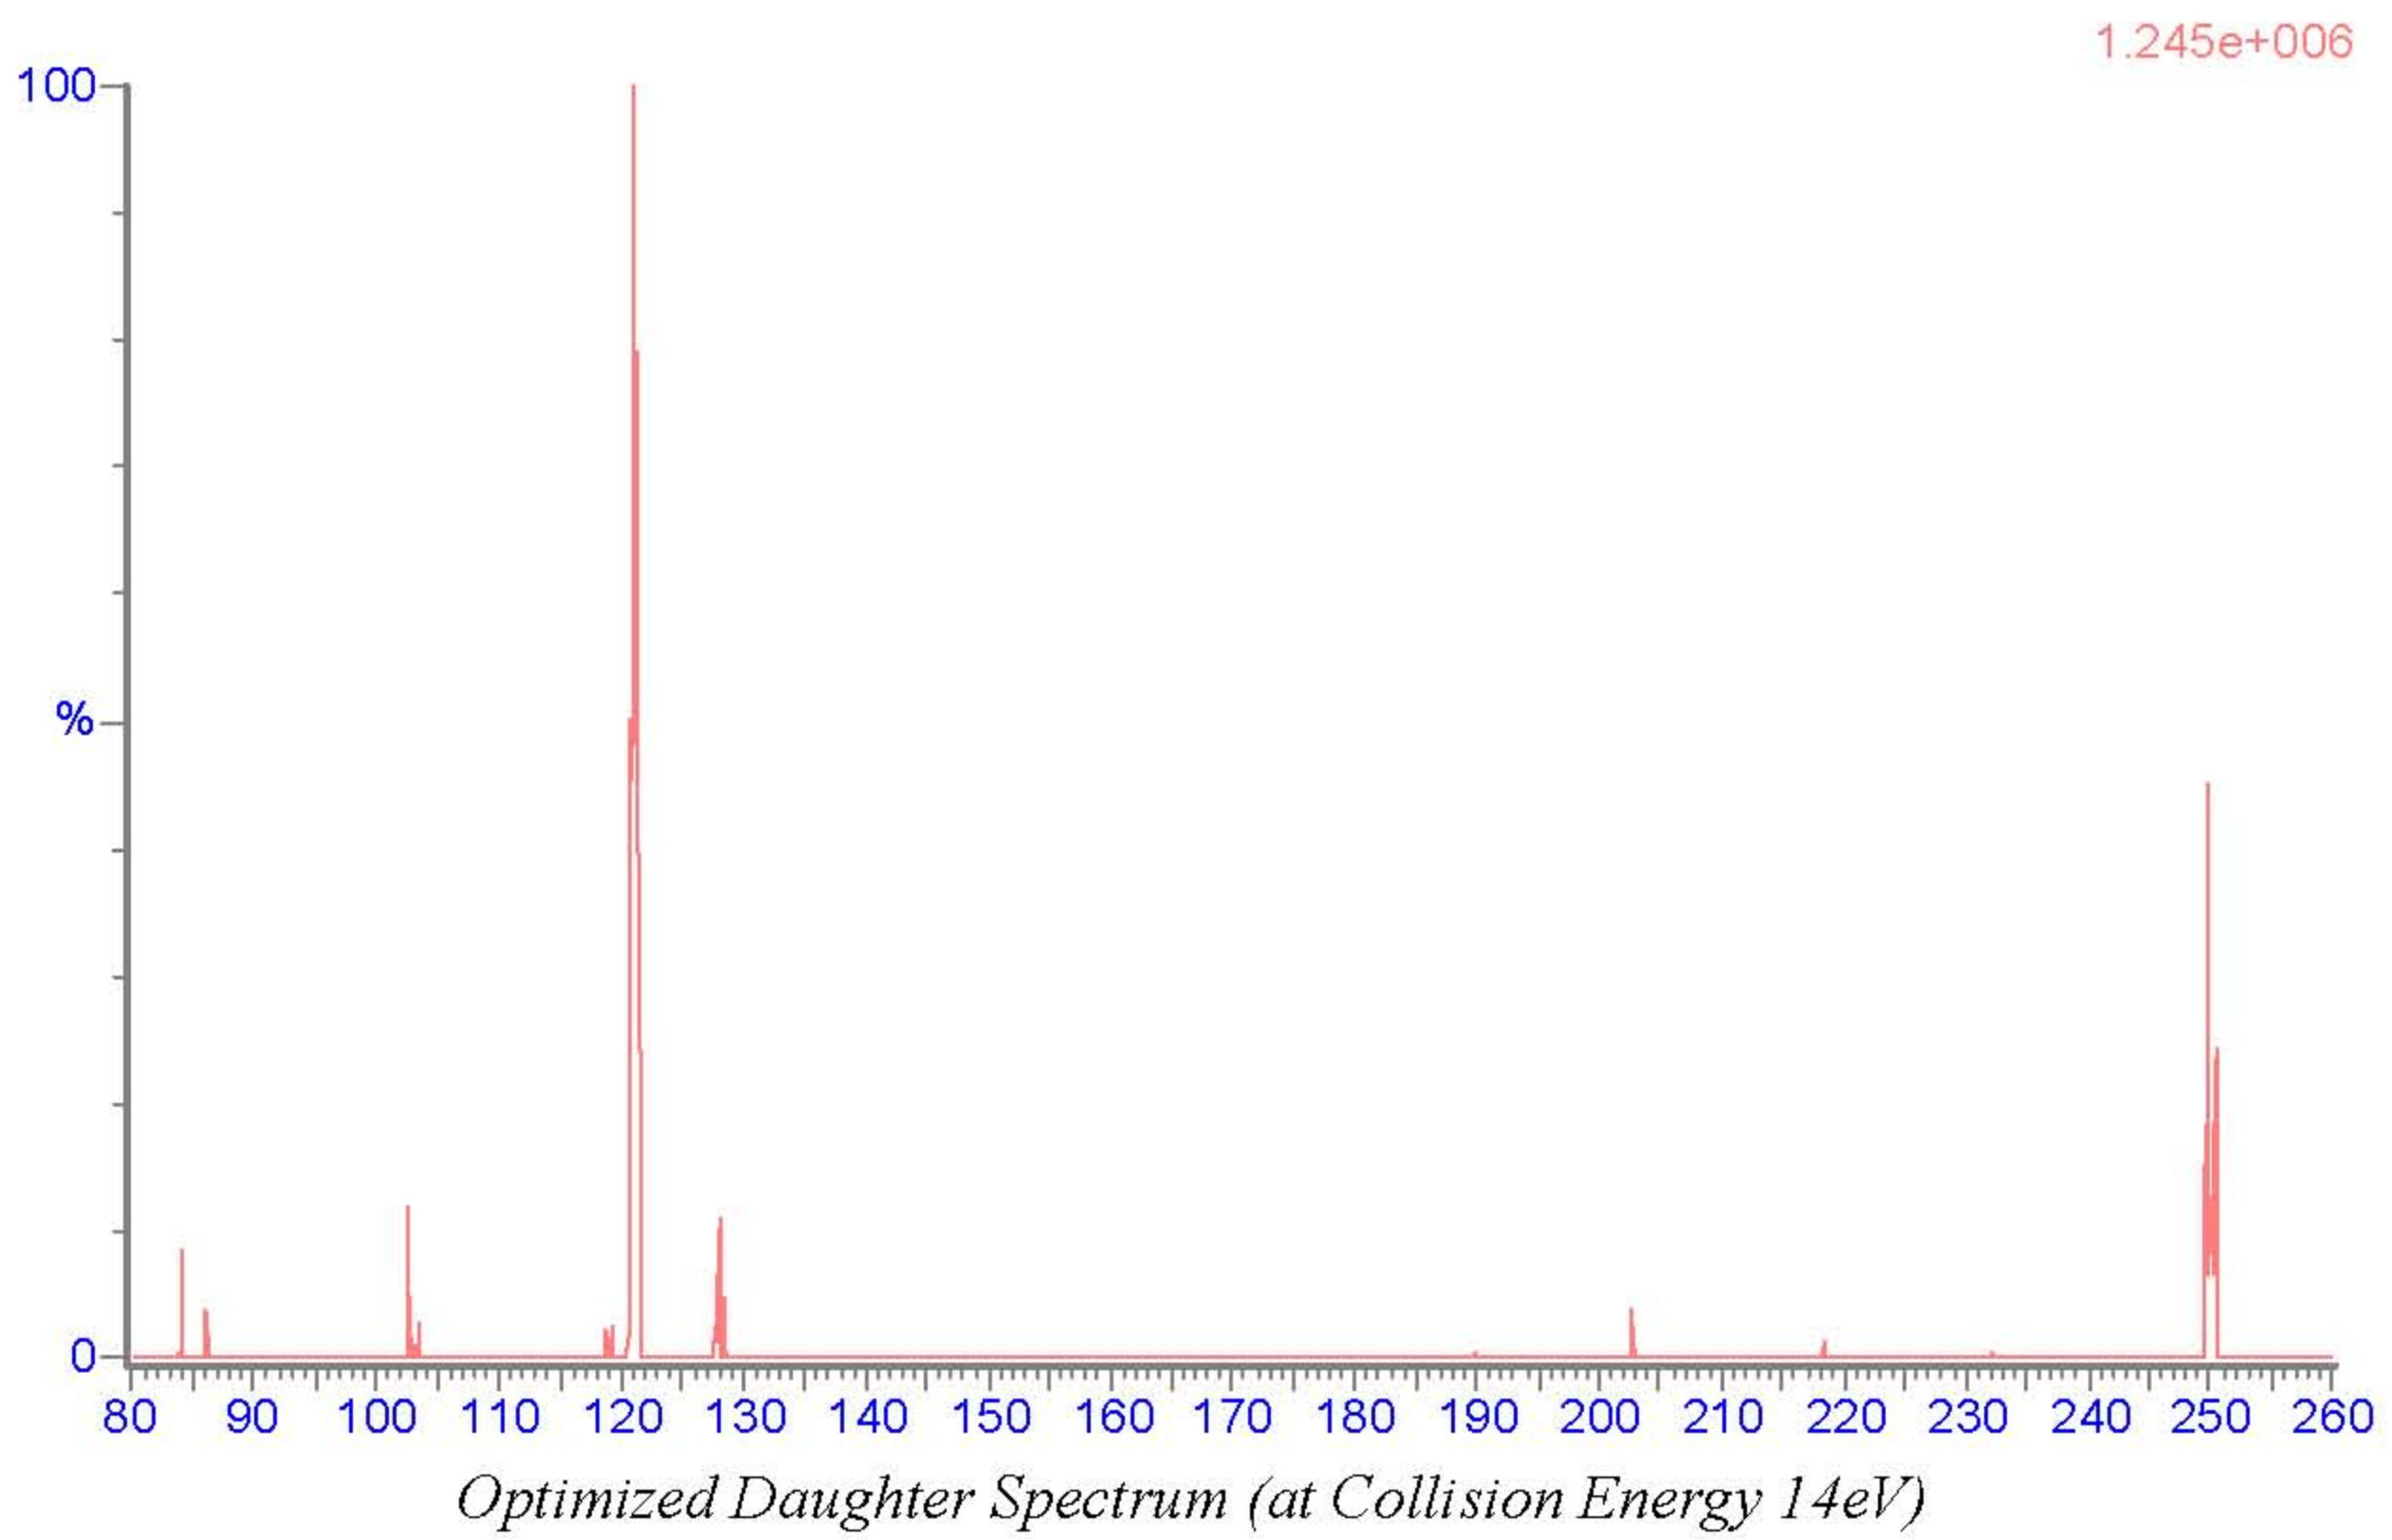

Only 3 stable transitions identified for DHBMA using the requested ion modes.
